# Supplementary material for: A systematic review of the incidence and prevalence of cardiac, cerebrovascular, and peripheral vascular disease in multiple sclerosis
Source: PubMed Central journal article supplement — Mult Scler. 2015 Mar;21(3):318–31. doi: 10.1177/1352458514564485 (PMC4404402; doi:10.1177/1352458514564485), 2015-03
Supplement: Supplemental_Figure_5.pdf [file Supplemental_Figure_5.pdf]

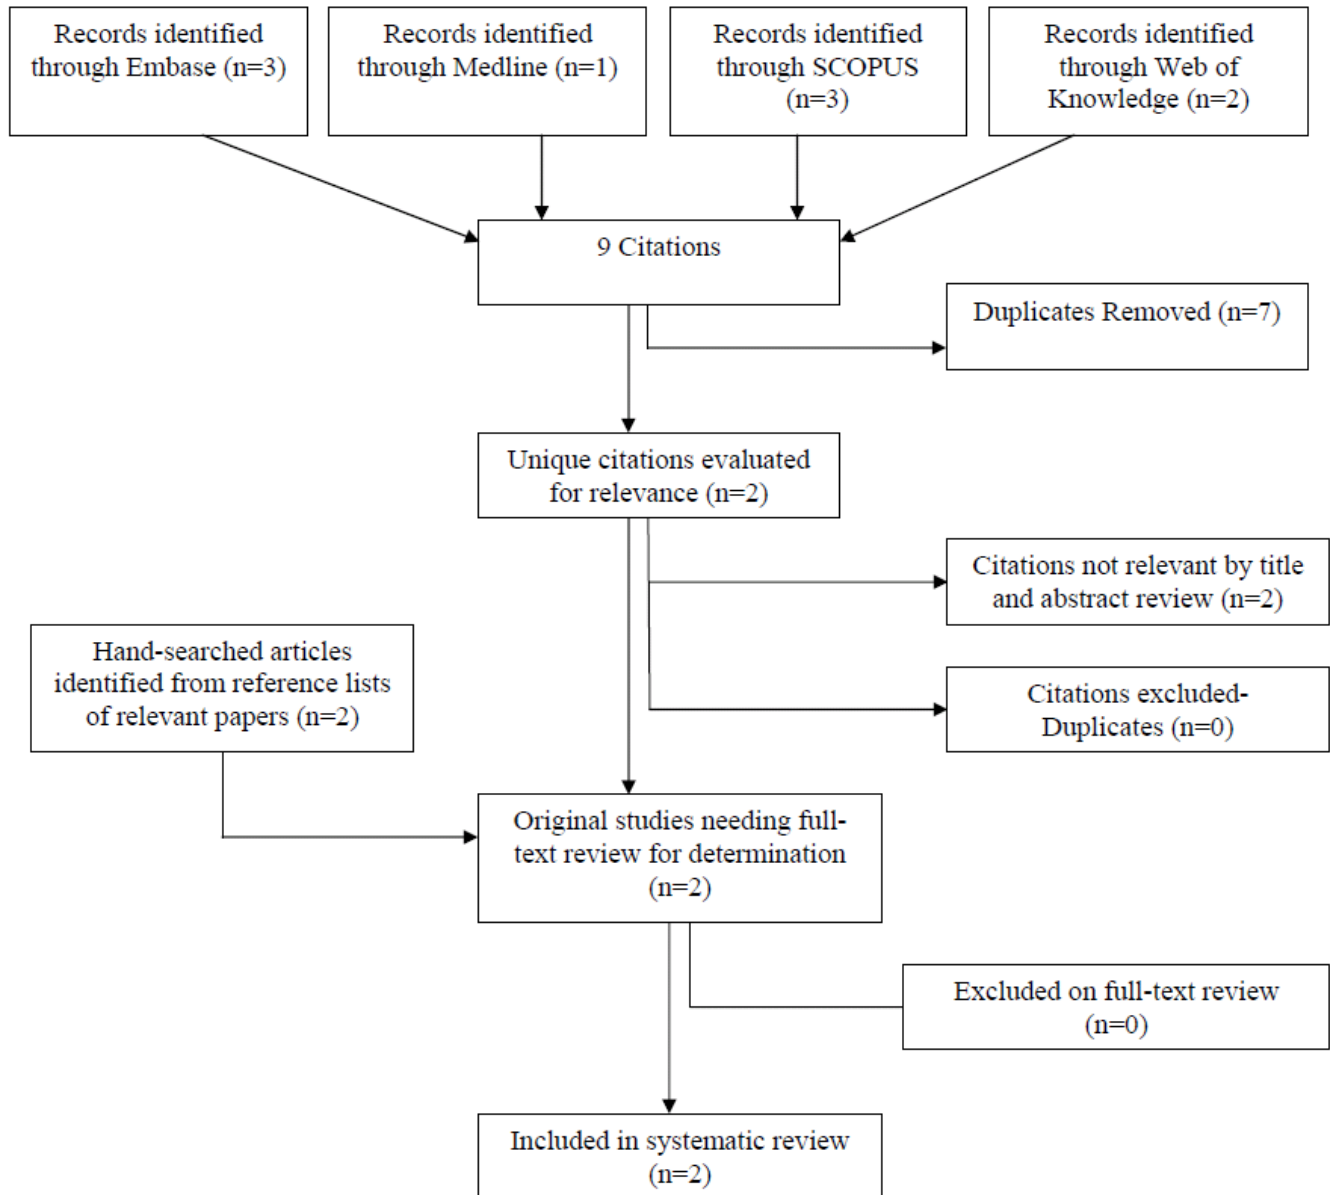

Supplemental Figure 5. Flow diagram of selection of studies evaluating comorbid cardiac valvular disease in multiple sclerosis for all years through November 1, 2013.
