# Supplementary material for: A systematic review of the incidence and prevalence of cardiac, cerebrovascular, and peripheral vascular disease in multiple sclerosis
Source: PubMed Central journal article supplement — Mult Scler. 2015 Mar;21(3):318–31. doi: 10.1177/1352458514564485 (PMC4404402; doi:10.1177/1352458514564485), 2015-03
Supplement: Supplemental_Table_1.pdf [file Supplemental_Table_1.pdf]

Supplemental Table 1. Studies reporting the incidence of diabetes in multiple sclerosis

| Study (year)                     | Region/Sub-Group         | Prevalence Day/Period | Diagnostic Criteria (MS)     | Diagnostic Criteria (Diabetes) | Crude Overall Incidence (95%CI)         | Age-Standardized Overall Incidence (95%CI) | Crude Incidence (95%CI) |         | Standardized Incidence (95%CI) |         | Quality Score |
|----------------------------------|--------------------------|-----------------------|------------------------------|--------------------------------|-----------------------------------------|--------------------------------------------|-------------------------|---------|--------------------------------|---------|---------------|
|                                  |                          |                       |                              |                                |                                         |                                            | Males                   | Females | Males                          | Females |               |
| Christiansen <sup>5</sup> (2010) | Denmark                  | 1977-2006             | ICD-10, ICD-8 prior to 1993  | DNRP codes (NR)                | 141/13,963 = 1.01%                      | NR                                         | NR                      | NR      | NR                             | NR      | 6/8           |
| Wynn <sup>47</sup> (1990)        | United States/ Minnesota | 1930-1984             | Neurologist diagnosed: Poser | Clinical chart review          | Diabetes 9/ 2,874 person years = 0.001% | NR                                         | NR                      | NR      | NR                             | NR      | 5/8           |

NR: Not Reported, GPRD- General Practice Research Database.
