# Supplementary material for: A systematic review of the incidence and prevalence of cardiac, cerebrovascular, and peripheral vascular disease in multiple sclerosis
Source: PubMed Central journal article supplement — Mult Scler. 2015 Mar;21(3):318–31. doi: 10.1177/1352458514564485 (PMC4404402; doi:10.1177/1352458514564485), 2015-03
Supplement: Supplemental_Table_2.pdf [file Supplemental_Table_2.pdf]

**Supplemental Table 2. Studies reporting the prevalence of diabetes in multiple sclerosis**

| Study<br>(Year)                   | Region/<br>Sub-Region           | Source/<br>Population                                                                                                                                                             | Prevalence<br>Day/Period | Diagnostic<br>Criteria: MS/<br>Established By                                                                    | Diagnostic<br>Criteria:<br>Diabetes/<br>Established By                                                                                               | Crude Overall<br>Prevalence<br>(95%CI)                                         | Age-<br>Standardized<br>Overall<br>Prevalence<br>(95%CI) | Crude Prevalence<br>(95%CI) |         | Standardized<br>Prevalence<br>(95%CI) |         | Quality<br>Score |
|-----------------------------------|---------------------------------|-----------------------------------------------------------------------------------------------------------------------------------------------------------------------------------|--------------------------|------------------------------------------------------------------------------------------------------------------|------------------------------------------------------------------------------------------------------------------------------------------------------|--------------------------------------------------------------------------------|----------------------------------------------------------|-----------------------------|---------|---------------------------------------|---------|------------------|
|                                   |                                 |                                                                                                                                                                                   |                          |                                                                                                                  |                                                                                                                                                      |                                                                                |                                                          | Males                       | Females | Males                                 | Females |                  |
| Allen <sup>7</sup><br>(2008)      | United<br>States/<br>New York   | SPARCS/<br>95% of New<br>York State<br>acute care<br>hospitalizations                                                                                                             | 1988-2002                | ICD-9-CM 340.0<br>as secondary<br>discharge<br>diagnosis                                                         | Diabetes:<br>ICD-9-CM 250 as<br>primary or<br>secondary<br>discharge<br>diagnosis                                                                    | Diabetes<br>1,054/9,949 =<br>10.6%                                             | NR                                                       | NR                          | NR      | NR                                    | NR      | 4/8              |
| Barcellos <sup>15</sup><br>(2006) | United<br>States/<br>California | Dataset<br>consisting of<br>176<br>families,<br>each family<br>with at least<br>1 index case<br>of multiple<br>sclerosis<br>176 “index<br>cases” and<br>386 “overall<br>MS cases” | NR                       | Neurologist<br>diagnosed/String<br>ently ascertained<br>and clinically<br>characterized<br>multiple<br>sclerosis | Mailed<br>questionnaire,<br>telephone<br>interview/Age of<br>onset was used to<br>differentiate<br>between type-1<br>and type-2 diabetes<br>mellitus | Type 1 Diabetes<br>~0.2% (overall<br>cases)<br><br>Raw numbers<br>not provided | NR                                                       | NR                          | NR      | NR                                    | NR      | 4/9              |

|                                         |                           |                                                                                                            |                   |                                            |                                                    |                                                                    |    |    |    |    |    |     |
|-----------------------------------------|---------------------------|------------------------------------------------------------------------------------------------------------|-------------------|--------------------------------------------|----------------------------------------------------|--------------------------------------------------------------------|----|----|----|----|----|-----|
| Buchanan <sup>1</sup><br>6<br>(2006)    | United States             | Randomly selected from NMSS membership                                                                     | Oct 2004-Jan 2005 | Mailed Survey                              | Diabetes:<br>Telephone survey/<br>Mailed survey    | Urban<br>13.7%<br>Adjacent rural<br>27.1%<br>Remote rural<br>11.8% | NR | NR | NR | NR | NR | 2/9 |
| Christianse<br>n <sup>5</sup><br>(2010) | Denmark                   | DNRP                                                                                                       | 1977-2006         | ICD-10 G35.9,<br>ICD-8 340 (prior to 1993) | Diabetes:<br>DNRP codes                            | Diabetes<br>178/13,963 =<br>1.27%                                  | NR | NR | NR | NR | NR | 6/8 |
| Dallmeijer<br>17<br>(2009)              | Netherlands/<br>Amsterdam | Newly diagnosed MS, source NR                                                                              | NR                | NR                                         | Diabetes:<br>CIRS (medical records review)         | Diabetes<br>6/146 = 4.11%                                          | NR | NR | NR | NR | NR | 2/9 |
| De Keyser <sup>18</sup><br>(1988)       | England/<br>London        | Patients at the National Hospital for Nervous Diseases with clinically or laboratory supported definite MS | 1979-1984         | Neurologist diagnosed: Poser               | Medical records                                    | Type I Diabetes Mellitus<br>4/828 = 0.48%                          | NR | NR | NR | NR | NR | 3/8 |
| Deretzi <sup>19</sup><br>(2010)         | Greece/<br>North          | Neurology department/<br>RRMS                                                                              | Jan 200-Jan 2009  | Neurologist diagnosed:<br>McDonald 2001    | Insulin dependent diabetes mellitus<br>Neurologist | Type I diabetes<br>33/981 = 3.36%                                  | NR | NR | NR | NR | NR | 6/9 |

|                                 |                        |                                                     |               |                                                   |                                                                                      |                                                                                                                                         |    |    |    |    |    |     |
|---------------------------------|------------------------|-----------------------------------------------------|---------------|---------------------------------------------------|--------------------------------------------------------------------------------------|-----------------------------------------------------------------------------------------------------------------------------------------|----|----|----|----|----|-----|
|                                 |                        | patients                                            |               |                                                   | administered questionnaire, confirmed by hospitalization records and medical reports |                                                                                                                                         |    |    |    |    |    |     |
| Eaton <sup>20</sup><br>(2007)   | Denmark                | Hospitalized MS population                          | 1997- 2001    | Administrative data codes (ICD8 340.0, ICD10 G35) | Type I Diabetes <sup>c</sup><br>ICD-8 250.0<br>ICD-10 E10                            | Type I diabetes<br>147/9,961 =<br>1.48%                                                                                                 | NR | NR | NR | NR | NR | 4/8 |
| Edwards <sup>21</sup><br>(2004) | England/<br>Nottingham | Outpatient MS clinic                                | NR            | MS clinic database                                | Type I Diabetes: Registry/Clinical Database/Chart Review                             | 6/658 = 0.91%                                                                                                                           | NR | NR | NR | NR | NR | 2/8 |
| Fleming <sup>11</sup><br>(1994) | United States          | Hospitalized Medicare MS population, age ≥ 65 years | 1989          | ICD-9-CM code 340                                 | Diabetes: Administrative data code (code NR)                                         | Diabetes Uncomplicated Type II: 3.08/100<br>Diabetes Uncomplicated Type I: 1.94/100<br>Diabetes with complications Type I NOS: 0.86/100 | NR | NR | NR | NR | NR | 4/8 |
| Fromont <sup>23</sup>           | France                 | Whole                                               | Oct 31, 1995- | Neurologist,                                      | Diabetes/                                                                            | Diabetes                                                                                                                                | NR | NR | NR | NR | NR | 7/8 |

|                                        |                        |                                                                               |              |                                                                                                      |                                                                                               |                                        |    |    |    |    |    |     |
|----------------------------------------|------------------------|-------------------------------------------------------------------------------|--------------|------------------------------------------------------------------------------------------------------|-----------------------------------------------------------------------------------------------|----------------------------------------|----|----|----|----|----|-----|
| (2013)                                 |                        | population of newly diagnosed MS patients with ALD status before age 45 years | Oct 31, 2004 | ALD status 25                                                                                        | Administrative data codes ALD 8                                                               | 115/22,087 = 0.52%                     |    |    |    |    |    |     |
| Finlayson <sup>2</sup><br>(2013)       | United States/Illinois | Community-dwelling recruited from advertisements                              | NR           | Self-report                                                                                          | Self-report                                                                                   | Diabetes 15/178 = 8.43%                | NR | NR | NR | NR | NR | 2/9 |
| Henderson <sup>24</sup><br>(2000)      | Australia/Queensland   | Royal Brisbane Hospital Department of Neurology/Admitted patients             | 1992-1997    | Initially identified from medical records ICD 340, 205/later confirmed neurologist diagnosis (Poser) | Diabetes Mellitus Type I/ Mailed questionnaire                                                | Diabetes Mellitus Type I 1/117 = 0.85% | NR | NR | NR | NR | NR | 4/9 |
| Hoppenbrouwers <sup>25</sup><br>(2007) | Netherlands            | Genetically isolated community                                                | NR           | Poser                                                                                                | Type I Diabetes/ Interview, self-report. Defined by the Expert committee on the Diagnosis and | Type I Diabetes 0/48 = 0%              | NR | NR | NR | NR | NR | 7/9 |

|                                 |                                                  |                                                                |                      |                                                                | Classification of Diabetes Mellitus                                                                                                        |                                                                                                                |    |    |    |    |    |     |
|---------------------------------|--------------------------------------------------|----------------------------------------------------------------|----------------------|----------------------------------------------------------------|--------------------------------------------------------------------------------------------------------------------------------------------|----------------------------------------------------------------------------------------------------------------|----|----|----|----|----|-----|
| Horton <sup>26</sup><br>(2010)  | Canada/<br>Manitoba<br>United<br>States/<br>Ohio | Participants<br>recruited<br>from 2<br>different MS<br>clinics | Oct 2008-Oct<br>2009 | MacDonald<br>2005; diagnosed<br>by neurologist at<br>MS clinic | Diabetes<br><br>The Self-<br>Administered<br>Comorbidity<br>Questionnaire<br>(validated<br>questionnaire) and<br>medical records<br>review | Diabetes<br><br>17/404 = 4.2%<br><br>by medical<br>records and<br>questionnaire                                | NR | NR | NR | NR | NR | 5/8 |
| Hussein <sup>27</sup><br>(2006) | Saudi Arabia                                     | MS Center                                                      | 1991-1997            | NR                                                             | Type I and II<br>Diabetes:<br>Clinical<br>Database/Medical<br>Chart Review                                                                 | Type I:<br><br>11/1,206 =<br>0.92% (0.38-<br>1.46)<br><br>Type II:<br><br>81/1,206 =<br>6.75% ( 6.74-<br>6.76) | NR | NR | NR | NR | NR | 1/9 |
| Jadidi <sup>28</sup><br>(2013)  | Sweden                                           | M&H Co<br>Database,<br>incident MS                             | 1987-2009            | ICD-8<br><br>340<br>ICD-9<br><br>340<br>ICD-10<br><br>G35      | Diabetes:<br><br>Administrative<br>data codes                                                                                              | Diabetes<br><br>105/7,664 =<br>1.37%                                                                           | NR | NR | NR | NR | NR | 5/8 |
| Kang <sup>8</sup>               | Taiwan                                           | NHIRD                                                          | 2007                 | At least two                                                   | Type I: ICD-9-CM                                                                                                                           | Type I: 3/898 =                                                                                                | NR | NR | NR | NR | NR | 4/8 |

|                                 |                                      |                                                                                                 |                      |                                                                                            |                                                                                                                                                                                                                                                                                                            |                                         |    |    |    |    |    |     |
|---------------------------------|--------------------------------------|-------------------------------------------------------------------------------------------------|----------------------|--------------------------------------------------------------------------------------------|------------------------------------------------------------------------------------------------------------------------------------------------------------------------------------------------------------------------------------------------------------------------------------------------------------|-----------------------------------------|----|----|----|----|----|-----|
| (2010)                          |                                      | population,<br>age $\geq 15$<br>years                                                           |                      | claims with<br>ICD-9-CM code<br>340 in 2007,<br>under care of<br>certified<br>neurologist, | 250.01, 250.03,<br>250.11, 250.13,<br>250.21, 250.23,<br>250.31, 250.33,<br>250.41, 250.43,<br>250.51,<br>250.61, 250.63,<br>250.71, 250.73,<br>250.81, 250.83,<br>250.91, 250.93<br>Type II: All ICD-<br>9-CM 250<br>excluding Type I<br>Diabetes<br>at least one<br>hospital or two<br>ambulatory claims | 0.33%<br><br>Type II: 77/898<br>= 8.57% |    |    |    |    |    |     |
| Kanjwal <sup>29</sup><br>(2010) | United<br>States/<br>Toledo,<br>Ohio | Patients<br>followed up<br>at the<br>University<br>of Toledo<br>Autonomic<br>Disorder<br>Center | 1998-2008            | Neurologist<br>(criteria not<br>specified)                                                 | Medical chart<br>review                                                                                                                                                                                                                                                                                    | Diabetes<br>2/9= 22.2%                  | NR | NR | NR | NR | NR | 3/8 |
| Khan <sup>9</sup><br>(2007)     | Australia/<br>Melbourne              | MS database<br>Royal                                                                            | Jan 2005-Feb<br>2005 | Neurologist<br>diagnosed: Poser                                                            | Self-report                                                                                                                                                                                                                                                                                                | Diabetes<br>2/62 = 3.23%                | NR | NR | NR | NR | NR | 3/9 |

|                                      |                                       |                                                                                   |                           |                                                                                                                |                                                                                                                           |                                        |    |                          |               |    |    |     |
|--------------------------------------|---------------------------------------|-----------------------------------------------------------------------------------|---------------------------|----------------------------------------------------------------------------------------------------------------|---------------------------------------------------------------------------------------------------------------------------|----------------------------------------|----|--------------------------|---------------|----|----|-----|
|                                      |                                       | Melbourne Hospital                                                                |                           | and Paty                                                                                                       |                                                                                                                           |                                        |    |                          |               |    |    |     |
| Langer-Gould <sup>30</sup><br>(2010) | United States/<br>Northern California | KPNC population                                                                   | 1994-<br>December<br>2005 | Diagnostic codes entered by neurologists and GPs , MS-specific medications, MRI (codes/criteria not specified) | Type I Diabetes:<br>At least two administrative data codes by a specialist (KPNC) (codes not specified)                   | Type I Diabetes<br>45/5,296 =<br>0.85% | NR | NR                       | NR            | NR | NR | 6/8 |
| Laroni <sup>31</sup><br>(2006)       | Italy/ Veneto                         | Multiple Sclerosis Centre of Veneto Region                                        | NR                        | Poser                                                                                                          | Type I Diabetes:<br>Medical chart review/interviews/<br>Self Report                                                       | Type I Diabetes<br>9/245 = 3.7%        | NR | NR                       | NR            | NR | NR | 5/8 |
| LaVela <sup>10</sup><br>(2012)       | United States                         | National cohort of male Veterans with MS, members of veteran service organization | 2003, 2004                | Veterans Benefits Department confirmed                                                                         | Diabetes:<br>Telephone and mailed survey (Multiple Sclerosis- Health Care Questionnaire using questions similar to BRFSS) | Diabetes<br>NR                         | NR | 182/<br>1,142 =<br>15.9% | NR            | NR | NR | 4/8 |
| Lindegard <sup>3</sup><br>2          | Sweden                                | Native Swedes born                                                                | 1970-1979                 | ICD 340, 341 inpatient records                                                                                 | Diabetes:<br>ICD 250, inpatient                                                                                           | Young males<br>2.9%                    | NR | Young males              | Young females | NR | NR | 4/8 |

|                                                                                               |                                |                                                   |                         |                         |                                                                                     |                                                                                                                       |    |                                |                                  |    |    |     |
|-----------------------------------------------------------------------------------------------|--------------------------------|---------------------------------------------------|-------------------------|-------------------------|-------------------------------------------------------------------------------------|-----------------------------------------------------------------------------------------------------------------------|----|--------------------------------|----------------------------------|----|----|-----|
| (1985)                                                                                        |                                | 1911-1940<br>in<br>Gothenburg                     |                         |                         | records                                                                             | Older males<br>6.9%<br>Young females<br>1.4%<br>Older females<br>6.4%                                                 |    | 2.9%<br>Older<br>males<br>6.9% | 1.4%<br>Older<br>females<br>6.4% |    |    |     |
| Lu <sup>33</sup><br>(2013)                                                                    | Canada/<br>British<br>Columbia | British<br>Columbia<br>MS database                | Apr 1998-<br>March 2009 | Poser,<br>McDonald 2005 | Diabetes or<br>abnormal glucose:<br>Administrative<br>data (codes not<br>specified) | Diabetes<br>17/432 = 4%                                                                                               | NR | NR                             | NR                               | NR | NR | 5/8 |
| Marrie <sup>35</sup><br><sup>a</sup> (2008)<br><br>Marrie <sup>a</sup><br><sup>b</sup> (2011) | United<br>States               | NARCOMS<br>Registry<br>population<br>(volunteers) | October 2006            | Self-report             | Diabetes:<br>Online/Mailed<br>Survey                                                | Diabetes<br>532/8,785 =<br>6.1%<br><br>At MS Onset:<br>52/8740 = 0.6%<br><br>At MS<br>Diagnosis:<br>108/8740<br>=1.2% | NR | NR                             | NR                               | NR | NR | 5/9 |



|                                      |                     |                                  |                                     |                                                                                                                                                                                         |                                                                                                                                                                              |                                      |                      |      |      |    |    |     |
|--------------------------------------|---------------------|----------------------------------|-------------------------------------|-----------------------------------------------------------------------------------------------------------------------------------------------------------------------------------------|------------------------------------------------------------------------------------------------------------------------------------------------------------------------------|--------------------------------------|----------------------|------|------|----|----|-----|
| Marrie <sup>34</sup><br>(2012)       | Canada/<br>Manitoba | Entire<br>Manitoba<br>population | April 1, 1984-<br>March 31,<br>2007 | 1984–1997 all<br>cases with $\geq 7$<br>hospital or<br>physician claims<br>for MS. 1998-<br>2007 all cases<br>with $\geq 3$ hospital,<br>physician or<br>prescription<br>claims for MS. | Diabetes:<br>CCDSS<br>ICD-9 250, ICD-<br>10 E10-E14<br>$\geq 2$ hospital or<br>physician claims in<br>5 years                                                                | Diabetes<br><br>NR                   | 7.62%<br>(6.63-8.61) | NR   | NR   | NR | NR | 8/8 |
| Marrosu <sup>36</sup><br>^<br>(2002) | Italy/<br>Sardinia  | MS Clinic<br>in Cagliari         | Jan 1, 1989-<br>Dec 31, 2000        | Poser                                                                                                                                                                                   | Type I Diabetes:<br>Criteria reported<br>by the Expert<br>Committee on the<br>Diagnosis and<br>Classification of<br>Diabetes Mellitus<br>Medical chart<br>review/ Interviews | Diabetes<br>20/1090= 3.0%            | NR                   | 2.0% | 3.0% | NR | NR | 4/9 |
| Marrosu <sup>37</sup><br>^<br>(2004) | Italy/<br>Sardinia  | MS Clinic<br>in Cagliari         | Jan 1, 1989-<br>Dec 31, 2002        | Poser                                                                                                                                                                                   | Type I Diabetes:<br>Criteria reported<br>by the Expert<br>Committee on the<br>Diagnosis and<br>Classification of<br>Diabetes Mellitus<br>Medical chart                       | Type I Diabetes<br>31/1049=<br>3.0%* | NR                   | NR   | NR   | NR | NR | 3/9 |

|                                       |                                |                                                                                   |                              |                                | review                                                                                         |                                       |    |                    |                     |    |    |     |
|---------------------------------------|--------------------------------|-----------------------------------------------------------------------------------|------------------------------|--------------------------------|------------------------------------------------------------------------------------------------|---------------------------------------|----|--------------------|---------------------|----|----|-----|
| Midgard <sup>38</sup><br>(1996)       | Norway/<br>Hordaland<br>County | Identified<br>through two<br>population-<br>based<br>incidence<br>studies         | Jan 1, 1976-<br>Dec 31, 1986 | Bauer                          | Diabetes (?Type I)<br><br>Interviews<br>completed by<br>neurologists                           | Type I Diabetes<br><br>0/155 = 0%     | NR | NR                 | NR                  | NR | NR | 6/9 |
| Nuyen <sup>39</sup><br>(2006)         | Netherlands                    | DNSGP                                                                             | 2001                         | ICPC code N86                  | Diabetes:<br>Consultation with<br>GP during (1-year<br>period).<br>ICPC codes T87,<br>T88, T90 | Diabetes<br><br>4/241 = 1.7%          | NR | NR                 | NR                  | NR | NR | 5/8 |
| Paz<br>Soldan <sup>40</sup><br>(2012) | United<br>States/<br>Minnesota | MS patients<br>attending<br>the Mayo<br>Clinic or<br>Olmsted<br>Medical<br>Centre | 2000                         | Poser                          | Diabetes:<br>Medical Chart<br>Review                                                           | Diabetes<br><br>28/201 = 13.9%        | NR | NR                 | NR                  | NR | NR | 6/8 |
| Pitzalis <sup>41</sup><br>(2008)      | Italy/<br>Sardinia             | MS Clinics<br>in Cagliari,<br>multiplex<br>families                               | NR                           | NR                             | Type I Diabetes:<br>Medical Chart<br>Review/<br>Interviews                                     | Type I Diabetes<br><br>12/116 = 9.4%  | NR | NR                 | NR                  | NR | NR | 1/9 |
| Ramagopal <sup>42</sup><br>(2007)     | Canada                         | 19 MS<br>Clinics in<br>Canada                                                     | From 1993-<br>not specified  | Poser and/or<br>Macdonald 2005 | Type I Diabetes:<br>Medical chart<br>review/                                                   | Type I Diabetes<br><br>19/5031 = 0.4% | NR | 5/1,298<br>= 0.39% | 14/3,733 =<br>0.38% | NR | NR | 5/9 |

|                                  |                    |                                                                                                           |                         |                                                        |                                                                                                     |                               |    |    |    |    |    |     |
|----------------------------------|--------------------|-----------------------------------------------------------------------------------------------------------|-------------------------|--------------------------------------------------------|-----------------------------------------------------------------------------------------------------|-------------------------------|----|----|----|----|----|-----|
|                                  |                    |                                                                                                           |                         |                                                        | Standardized administered questionnaires                                                            |                               |    |    |    |    |    |     |
| Seyfert <sup>43</sup><br>(1990)  | Germany/<br>Berlin | All patients admitted to hospital for MS                                                                  | NR (18 month follow-up) | Neurologist diagnosed: Poser                           | Neurologist-administered questionnaire/<br>Confirmed by biological tests and medical records review | Diabetes<br>0/101 = 0%        | NR | NR | NR | NR | NR | 5/8 |
| Sheu <sup>44</sup><br>(2013)     | Taiwan             | LHID 2000 Database of Taiwan, incident MS enrolled in registry of catastrophic illness, and age >18 years | Jan 2002-Dec 2009       | ICD-9-CM code 340 and certified by neurologist (Poser) | Diabetes: LHID Database. Codes not specified                                                        | Diabetes<br>36/316= 11.4%     | NR | NR | NR | NR | NR | 5/8 |
| Tremlett <sup>45</sup><br>(2002) | Wales              | Diagnosis of MS recorded after 1993 and registered in database                                            | 1993-1999               | Administrative data codes (GPMD) (code not specified)  | Type I Diabetes: Administrative data code and prescription of insulin                               | Type I Diabetes<br>0/320 = 0% | NR | NR | NR | NR | NR | 6/8 |

|                                 |                                |                                                                                                           |           |                                 |                                                                                               |                                                                                                                                    |    |    |    |    |    |     |
|---------------------------------|--------------------------------|-----------------------------------------------------------------------------------------------------------|-----------|---------------------------------|-----------------------------------------------------------------------------------------------|------------------------------------------------------------------------------------------------------------------------------------|----|----|----|----|----|-----|
|                                 |                                | 1995-1999                                                                                                 |           |                                 |                                                                                               |                                                                                                                                    |    |    |    |    |    |     |
| Wertman <sup>46</sup><br>(1992) | Israel                         | Israeli<br>National<br>Neurologica<br>I Disease<br>Register, all<br>MS patients<br>diagnosed<br>1950-1985 | 1950-1985 | Rose                            | Type I Diabetes:<br>Medical Chart<br>Review/ Clinical<br>assessment by<br>health professional | Type I Diabetes<br>8.98/1000 =<br>0.90%                                                                                            | NR | NR | NR | NR | NR | 4/8 |
| Wynn <sup>47</sup><br>(1990)    | United<br>States/<br>Minnesota | Mayo Clinic<br>clinical<br>records/ 206<br>incident<br>cases                                              | 1930-1984 | Neurologist<br>diagnosed: Poser | Clinical chart<br>review                                                                      | Insulin<br>dependant<br>diabetes<br>mellitus<br>3/206 = 1.46%<br>Non-insulin<br>dependant<br>diabetes<br>mellitus<br>8/206 = 3.88% | NR | NR | NR | NR | NR | 5/8 |

\*Calculated by hand. Value not provided by author.

a- Self-reported diagnoses of MS previously validated in random sample of study population against medical records and physician report; b – reported in another manuscript using the same study population

c- ICD-8 250.0 does not specifically identify type I diabetes.

^High likelihood of overlap between study populations of Marrosu, et al. (2002) and Marrosu, et al. (2004). Not possible to determine the level of overlap from information provided.

NR: Not Reported, SPARCS: New York Department of Health Statewide Planning and Research Cooperative System, NMSS: National Multiple Sclerosis Society, DNRP: Danish National Registry of Patients, CIRS: Cumulative Illness Rating Scale, ALD: (affections de longue duree), M&H Co Database- Migration and Health Cohort Database (contains over 15 linkable Swedish national registers), NHIRD: National Health Insurance Research Database, KPNC: Kaiser Permanente Northern California, NARCOMS: North American Research Committee on Multiple Sclerosis, GPMD: General Practice Morbidity Database. ICPC: International Classification of Primary Care, LHID 2000 Database: Taiwan Longitudinal Health Insurance Database
