# Supplementary material for: A systematic review of the incidence and prevalence of cardiac, cerebrovascular, and peripheral vascular disease in multiple sclerosis
Source: PubMed Central journal article supplement — Mult Scler. 2015 Mar;21(3):318–31. doi: 10.1177/1352458514564485 (PMC4404402; doi:10.1177/1352458514564485), 2015-03
Supplement: Supplemental_Table_3.pdf [file Supplemental_Table_3.pdf]

**Supplemental Table 3. The prevalence and incidence of diabetes in the multiple sclerosis population as compared to controls**

| Study (year)                        | MS, n  | Controls, n (matched)                             | Source of controls                                                                                   | Diabetes in MS                                                                                                                                | Diabetes in controls                                                                                                                       | Comparison                                                           |
|-------------------------------------|--------|---------------------------------------------------|------------------------------------------------------------------------------------------------------|-----------------------------------------------------------------------------------------------------------------------------------------------|--------------------------------------------------------------------------------------------------------------------------------------------|----------------------------------------------------------------------|
| <i>Prevalence</i>                   |        |                                                   |                                                                                                      |                                                                                                                                               |                                                                                                                                            |                                                                      |
| Allen <sup>7</sup> (2008)           | 9,949  | 19,898 (yes: sex, age, race/ethnicity, insurance) | Hospitalization from SPARCS database of non-MS patients                                              | 1,054/9,949 = 10.6%                                                                                                                           | 3780/19,898 = 19.0%                                                                                                                        | p<0.05                                                               |
| Christiansen <sup>5</sup> (2010)    | 13,963 | 66,407 (yes: sex, age)                            | DNRP general population                                                                              | 178/13,963 = 1.3%                                                                                                                             | 488/66,407 = 0.7%                                                                                                                          | NR                                                                   |
| Dallmeijer <sup>17</sup> (2009)     | 146    | 198 (no)                                          | Patients with a first-ever supratentorial stroke, who had been admitted for inpatient rehabilitation | 6/146 = 4.1%                                                                                                                                  | 23/198 = 12%                                                                                                                               | NR                                                                   |
| Edwards <sup>21</sup> (2004)        | 658    | 252,538 (no)                                      | England Midlands or general UK information from other studies                                        | 6/658 = 0.91%                                                                                                                                 | 128/252,538 = 0.05%                                                                                                                        | OR<br>18.14 (7.97-41.30)                                             |
| Fleming <sup>11</sup> (1994)        | 5384   | 5384 (yes: sex, age)                              | Medicare Population without history of MS                                                            | Diabetes Uncomplicated Type II<br>3.08/100<br>Diabetes Uncomplicated Type I<br>1.94/100<br>Diabetes with complications Type I NOS<br>0.86/100 | Diabetes Uncomplicated Type II<br>6/100<br>Diabetes Uncomplicated Type I<br>4.91/100<br>Diabetes with complications Type I NOS<br>2.16/100 | Statistically significant difference using X <sup>2</sup> (P < 0.05) |
| Fromont <sup>23</sup> (2013)        | 567    | 6,560,000 (no)                                    | Population covered by the CNAMTS                                                                     | 23.9% (men)<br>18.5% (women)                                                                                                                  | 9.2% (men)<br>8.6% (women)                                                                                                                 | P<0.01                                                               |
| Hoppenbrouwers <sup>25</sup> (2007) | 48     | 361 (no)                                          | First degree relatives<br>General Dutch Population                                                   | 0/48 = 0%                                                                                                                                     | First degree relatives:<br>2/361 = 0.55%                                                                                                   | NR                                                                   |

|                                      |       |                                                                                   |                                                                                   |                                                                                              |                                   |                                                                                                                                     |
|--------------------------------------|-------|-----------------------------------------------------------------------------------|-----------------------------------------------------------------------------------|----------------------------------------------------------------------------------------------|-----------------------------------|-------------------------------------------------------------------------------------------------------------------------------------|
|                                      |       |                                                                                   |                                                                                   |                                                                                              | General Dutch Population<br>0.4%  |                                                                                                                                     |
| Jadidi <sup>28</sup><br>(2013)       | 7,664 | 66,215 (yes: sex, age)                                                            | Total Population Register of Sweden                                               | 105/7,664 = 1.37%                                                                            | 689/66,214 = 1.04%                | NR                                                                                                                                  |
| Kang <sup>8</sup><br>(2010)          | 898   | 4490 (yes: sex, age, monthly income, level of urbanization in community)          | Randomly matched patients from the NHIRD                                          | Type I<br>0.3%<br>Type II<br>8.6%                                                            | Type I<br>0.0%<br>Type II<br>6.1% | OR Type I: N/A<br>OR Type 2: 1.5 (1.1-1.2)                                                                                          |
| Khan <sup>9</sup><br>(2007)          | 62    | 62 (no)                                                                           | Caregivers of MS participants                                                     | 2/62 = 3.23%                                                                                 | 4/62 = 6.45%                      | NR                                                                                                                                  |
| Langer-Gould <sup>30</sup><br>(2010) | 5,296 | 26,478 (yes: sex, age, KPNC facility, and duration and timing of KPNC membership) | KPNC electronic database                                                          | 45/5,296 = 0.85%                                                                             | 240/ 26,478 = 0.9%                | OR: 0.9 (0.7-1.3)                                                                                                                   |
| Laroni <sup>31</sup><br>(2006)       | 245   | 245 (yes: sex, age)                                                               | General population controls from northeast Italy                                  | 9/245 = 3.7%                                                                                 | 1/245 = 0.4%                      | P= 0.02                                                                                                                             |
| LaVela <sup>10</sup><br>(2012)       | 1,142 | 31,500 (no)                                                                       | General Veteran U.S. Population with no history of MS                             | 181/1,142 = 15.9%                                                                            | 4284/31,500 = 13.6%               | P= 0.02                                                                                                                             |
| Lindgard <sup>32</sup><br>(1985)     | 351   | 159,200 (yes: sex, age)                                                           | General Hospital in-patient hospitalization within the city of Gothenburg, Sweden | Young males<br>2.9%<br>Older males<br>6.9%<br>Young females<br>1.4%<br>Older females<br>6.4% | NR                                | Young males<br>NA<br>Older males<br>NA<br>Young females<br>MS patients 4 times more likely than controls (p<0.001)<br>Older females |

|                                     |       |                                                                                                                    |                                                         |                    |                                                                                                        |                                                                                              |
|-------------------------------------|-------|--------------------------------------------------------------------------------------------------------------------|---------------------------------------------------------|--------------------|--------------------------------------------------------------------------------------------------------|----------------------------------------------------------------------------------------------|
|                                     |       |                                                                                                                    |                                                         |                    |                                                                                                        | MS patients 11 times more likely than controls (p<0.001)                                     |
| Lu <sup>33</sup><br>(2013)          | 432   | 2,975 (yes: frequency-matched sample of births matched by maternal age, local health authority, and delivery year) | Female patients from the BCPDR                          | 17/ 432 = 4%       | 222/2,975 = 8%                                                                                         | P=0.01 X <sup>2</sup> test                                                                   |
| Marrie <sup>34</sup><br>(2012)      | 430   | 20,940 (yes: sex, age, region)                                                                                     | Manitoba Health Population Registry                     | 7.62% (6.63–8.61%) | 8.31% (7.84–8.78%)                                                                                     | Lower in the MS population in 1985 (PR 0.61; 0.44–0.86) but not in 2005 (PR 0.91; 0.81–1.03) |
| Marrosu <sup>36</sup><br>(2002)     | 1,090 | 2,180 parent of MS patients<br>3,300 siblings of MS patients<br>35,906 General Population of Oristano (yes)        | Relatives of MS patients (MS Clinic in Cagliari, Italy) | 20/1,090 = 3.0%    | Parents:<br>17/2,180 = 1.0%<br>Siblings<br>13/ 3,300 = 1.0%<br>General Population:<br>92/35,906 = 0.5% | P <0.0001 compared to general population of Oristano                                         |
| Midgard <sup>38</sup><br>(1996)     | 155   | 200 (yes: sex, age, place of residence)                                                                            | Hospital-based controls without a history of MS         | 0/155 = 0.0%       | 0/200= 0.0%                                                                                            | –                                                                                            |
| Ramagopalan <sup>42</sup><br>(2007) | 5,031 | 2,707 spouses(yes)<br>30,259 First degree relatives (yes)                                                          | Spouses and first degree relatives of MS patients       | 19/5,031 = 0.4%    | Spouses<br>14/2,707= 0.5%<br>First Degree Relatives<br>112/ 30,259 = 0.4%                              | χ <sup>2</sup> = 1.4, 2 degrees of freedom, p=0.49                                           |
| Seyfert <sup>43</sup>               | 101   | 97 (yes: sex, age)                                                                                                 | Clinic Personnel                                        | 0/101 = 0%         | 0/97 = 0%                                                                                              | --                                                                                           |

|                                     |        |                                                                                              |                                      |                                                                     |                                                                      |                                                                         |
|-------------------------------------|--------|----------------------------------------------------------------------------------------------|--------------------------------------|---------------------------------------------------------------------|----------------------------------------------------------------------|-------------------------------------------------------------------------|
| (1990)                              |        |                                                                                              |                                      |                                                                     |                                                                      |                                                                         |
| Sheu <sup>44</sup><br>(2013)        | 326    | 1580 (yes: sex, age,<br>index year)                                                          | LHID 2000 Database of Taiwan         | 36/316= 11.4%                                                       | 140/1580= 8.9%                                                       | P=0.157                                                                 |
| Tremlett <sup>45</sup><br>(2002)    | 320    | 320 (yes: sex, age,<br>GP surgery and, where<br>possible, smoking)                           | GPMD database                        | 0/320 = 0.0%                                                        | 0/320= 0.0%                                                          | –                                                                       |
| Wertman <sup>46</sup><br>(1992)     | 334    | NR                                                                                           | General Population of Israel in 1950 | 8.98/1,000 = 0.90%                                                  | 0.095/1,000 = 0.95%                                                  | 94.5 times greater<br>than general<br>population (one tail,<br>p<0.001) |
| <i>Incidence</i>                    |        |                                                                                              |                                      |                                                                     |                                                                      |                                                                         |
| Christiansen <sup>5</sup><br>(2010) | 13,963 | 66,407 (yes: sex, age)                                                                       | DNRP general population              | At 1year<br>178/13,963 = 1.3%<br>At 2-30 years<br>319/13,963 = 2.3% | At 1year<br>488/66,407 = 0.7%<br>At 2-30years<br>2,064/66,407 = 2.3% | NR                                                                      |
| Wynn <sup>47</sup><br>(1990)        | 191    | Expected values<br>calculated for<br>Rochester-based<br>incidence rates<br>between 1930-1984 | General population of Rochester      | Diabetes<br>9/ 2,874 person years =<br>0.001%                       | Diabetes<br>Expected:<br>6.2/ 2,874 person years =<br>0.22%          | RR<br>1.46 (0.67-2.78)                                                  |

NR: Not Reported, OR: Odds Ratio, RR: Relative Risk, SPARCS: New York Department of Health Statewide Planning and Research Cooperate System, CNAMTS: Caisse Nationale d'Assurance Maladie des Travailleurs Salarie's, NHIRD: National Health Insurance Research Database, BCPDR: British Columbia Perinatal Database Registry, GPMD: General Practice Morbidity Database, DNRP: Danish National Registry of Patients, LHID 2000 Database: Taiwan Longitudinal Health Insurance Database.
