# Supplementary material for: A systematic review of the incidence and prevalence of cardiac, cerebrovascular, and peripheral vascular disease in multiple sclerosis
Source: PubMed Central journal article supplement — Mult Scler. 2015 Mar;21(3):318–31. doi: 10.1177/1352458514564485 (PMC4404402; doi:10.1177/1352458514564485), 2015-03
Supplement: Supplemental_Table_4.pdf [file Supplemental_Table_4.pdf]

**Supplemental Table 4. Studies reporting the prevalence of hyperlipidemia in multiple sclerosis**

| Study (Year)                  | Region/ Sub-Region                      | Source/ Population                                        | Prevalence Day/Period | Diagnostic Criteria: MS/ Established By               | Diagnostic Criteria: Hyperlipidemia/ Established By                        | Crude Overall Prevalence (95% CI)                                    | Age-Standardized Overall Prevalence (95% CI) | Crude Prevalence (95% CI) |         | Standardized Prevalence (95% CI) |         | Quality Score |
|-------------------------------|-----------------------------------------|-----------------------------------------------------------|-----------------------|-------------------------------------------------------|----------------------------------------------------------------------------|----------------------------------------------------------------------|----------------------------------------------|---------------------------|---------|----------------------------------|---------|---------------|
|                               |                                         |                                                           |                       |                                                       |                                                                            |                                                                      |                                              | Males                     | Females | Males                            | Females |               |
| Allen <sup>7</sup> (2008)     | United States/ New York                 | SPARCS/ 95% of New York State acute care hospitalizations | 1988-2002             | ICD-9-CM 340.0 as secondary discharge diagnosis       | ICD-9-CM 272 from primary and secondary discharge diagnosis                | 298/9,949 = 3.0%                                                     | NR                                           | NR                        | NR      | NR                               | NR      | 4/8           |
| Buchanan <sup>16</sup> (2006) | United States                           | Randomly selected from NMSS membership                    | Oct 2004-Jan 2005     | Mailed Survey                                         | Telephone survey/ Mailed survey                                            | Urban 13.7%<br>Adjacent rural 11.9%<br>Remote rural 12.2%            | NR                                           | NR                        | NR      | NR                               | NR      | 2/9           |
| Horton <sup>26</sup> (2010)   | Canada/ Manitoba<br>United States/ Ohio | Participants recruited from 2 different MS clinics        | Oct 2008-Oct 2009     | MacDonald 2005; diagnosed by neurologist at MS clinic | The Self-Administered Comorbidity Questionnaire (validated questionnaire). | 55/404 = 15.6% by medical records<br>60/404 = 14.9% by questionnaire | NR                                           | NR                        | NR      | NR                               | NR      | 5/8           |

|                                 |                                |                                                                                                 |                      |                                                 | Validated by<br>medical records<br>data.                                                                                       |                    |    |                          |    |    |    |     |
|---------------------------------|--------------------------------|-------------------------------------------------------------------------------------------------|----------------------|-------------------------------------------------|--------------------------------------------------------------------------------------------------------------------------------|--------------------|----|--------------------------|----|----|----|-----|
| Kang <sup>8</sup><br>(2010)     | Taiwan                         | NHIRD<br>population,<br>age ≥15<br>years                                                        | 2007                 | ICD-9-CM code<br>340                            | ICD-9-CM<br>272.0-272.4<br>at least one<br>hospital or two<br>ambulatory claims                                                | 126/898 =<br>14.0% | NR | NR                       | NR | NR | NR | 4/8 |
| Kanjwal <sup>29</sup><br>(2010) | United States/<br>Toledo, Ohio | Patients<br>followed up<br>at the<br>University<br>of Toledo<br>Autonomic<br>Disorder<br>Center | 1998-2008            | Neurologist<br>(criteria not<br>specified)      | Medical chart<br>review/physician<br>letters review                                                                            | 5/9 = 55.6%        | NR | NR                       | NR | NR | NR | 3/8 |
| Khan <sup>9</sup><br>(2007)     | Australia/Mel<br>bourne        | MS database<br>Royal<br>Melbourne<br>Hospital                                                   | Jan 2005-Feb<br>2005 | Neurologist<br>diagnosed: Poser<br>and Paty     | Self-report                                                                                                                    | 12/62 = 19.4%      | NR | NR                       | NR | NR | NR | 6/9 |
| LaVela <sup>10</sup><br>(2012)  | United States                  | National<br>cohort of<br>male<br>Veterans<br>with MS,<br>members of<br>veteran                  | 2003, 2004           | Veterans<br>Benefits<br>Department<br>confirmed | Telephone and<br>mailed survey<br>(Multiple<br>Sclerosis- Health<br>Care Questionnaire<br>using questions<br>similar to BRFSS) | NR                 | NR | 553/<br>1,142 =<br>48.5% | NR | NR | NR | 4/8 |

|                                                                                                |                  |                                          |                               |                                                                                                                                                             |                                                                                                                                                                 |                                                                                                  |                   |    |    |    |    |     |
|------------------------------------------------------------------------------------------------|------------------|------------------------------------------|-------------------------------|-------------------------------------------------------------------------------------------------------------------------------------------------------------|-----------------------------------------------------------------------------------------------------------------------------------------------------------------|--------------------------------------------------------------------------------------------------|-------------------|----|----|----|----|-----|
|                                                                                                |                  | service organization                     |                               |                                                                                                                                                             |                                                                                                                                                                 |                                                                                                  |                   |    |    |    |    |     |
| Marrie <sup>35</sup><br><sup>a</sup> (2008)<br><br>Marrie <sup>51</sup><br><sup>b</sup> (2011) | United States    | NARCOMS Registry population (volunteers) | October 2006                  | Self-report                                                                                                                                                 | Online/Mailed Survey                                                                                                                                            | 3,237/8,757 = 37.0%<br><br>At MS onset: 227/8,427 = 2.7%<br><br>At MS diagnosis: 555/8427 = 6.6% | NR                | NR | NR | NR | NR | 5/9 |
| Marrie <sup>34</sup><br>(2012)                                                                 | Canada/ Manitoba | Entire Manitoba population               | April 1, 1984- March 31, 2007 | 1984–1997 all cases with $\geq 7$ hospital or physician claims for MS. 1998–2007 all cases with $\geq 3$ hospital, physician or prescription claims for MS. | ICD-9 272, ICD-10 E780, E782, E784, E785, ATC codes C10 (lipid modifying agents) $\geq 1$ hospital or 2 physician claims or 2 prescription claims in five years | NR                                                                                               | 13.8% (12.4-15.2) | NR | NR | NR | NR | 8/8 |
| Nuyen <sup>39</sup><br>(2006)                                                                  | Netherlands      | DNSGP                                    | 2001                          | ICPC code N86                                                                                                                                               | Consultation with GP during (1-year period)<br>ICPC codes T82;                                                                                                  | 11/241 = 4.6%                                                                                    | NR                | NR | NR | NR | NR | 5/8 |

|                                    |                             |                                                                                                                                      |                      |                                                                                   | T83; T93                                 |                    |    |    |    |    |    |     |
|------------------------------------|-----------------------------|--------------------------------------------------------------------------------------------------------------------------------------|----------------------|-----------------------------------------------------------------------------------|------------------------------------------|--------------------|----|----|----|----|----|-----|
| Paz Soldan <sup>40</sup><br>(2012) | United States/<br>Minnesota | All MS<br>patients<br>living in<br>Olmsted<br>County in<br>2000                                                                      | 2000                 | Poser                                                                             | Medical Chart<br>Review                  | 81/201 = 40.3%     | NR | NR | NR | NR | NR | 6/8 |
| Sheu <sup>44</sup><br>(2013)       | Taiwan                      | LHID 2000<br>Database of<br>Taiwan,<br>incident MS<br>enrolled in<br>registry of<br>catastrophic<br>illness, and<br>age >18<br>years | Jan 2002-Dec<br>2009 | LHID Database.<br>ICD-9-CM code<br>340 and certified<br>by neurologist<br>(Poser) | LHID Database.<br>Codes not<br>specified | 55/316= 17.4%      | NR | NR | NR | NR | NR | 5/8 |
| Sun <sup>52</sup><br>(2013)        | Taiwan                      | NHIRD<br>Incident MS<br>cases<br>diagnosed<br>1997-2010                                                                              | 1997-2010            | ICD-9-CM code<br>340                                                              | ICD-9-CM code<br>250                     | 73/1292 =<br>5.65% | NR | NR | NR | NR | NR | 5/8 |

NR: Not Reported, SPARCS: New York Department of Health Statewide Planning and Research Cooperate System, NHIRD: National Health Insurance Research Database, BRFSS:

Behavioral Risk Factor Surveillance System, NARCOMS: North American Research Committee on Multiple Sclerosis, DNSGP: Dutch National Survey of General Practice, GP: General Practitioner, LHID 2000 Database: Taiwan Longitudinal Health Insurance Database.

a- Self-reported diagnoses of MS previously validated in random sample of study population against medical records and physician report; b – reported in another manuscript using the same study population
