# Supplementary material for: A systematic review of the incidence and prevalence of cardiac, cerebrovascular, and peripheral vascular disease in multiple sclerosis
Source: PubMed Central journal article supplement — Mult Scler. 2015 Mar;21(3):318–31. doi: 10.1177/1352458514564485 (PMC4404402; doi:10.1177/1352458514564485), 2015-03
Supplement: Supplemental_Table_6.pdf [file Supplemental_Table_6.pdf]

**Supplemental Table 6. Studies reporting the incidence of hypertension in multiple sclerosis**

| Study<br>(Year)             | Region/<br>Sub-<br>Region | Source/<br>Populatio<br>n                  | Prevalence<br>Day/Period | Diagnostic<br>Criteria: MS/<br>Established By | Diagnostic<br>Criteria:<br>Hypertension/<br>Established By | Crude Overall<br>Incidence<br>(95%CI) | Age-<br>Standardized<br>Overall<br>Incidence<br>(95%CI) | Crude Incidence<br>(95%CI) |         | Standardized<br>Incidence (95%CI) |         | Quality<br>Score |
|-----------------------------|---------------------------|--------------------------------------------|--------------------------|-----------------------------------------------|------------------------------------------------------------|---------------------------------------|---------------------------------------------------------|----------------------------|---------|-----------------------------------|---------|------------------|
|                             |                           |                                            |                          |                                               |                                                            |                                       |                                                         | Males                      | Females | Males                             | Females |                  |
| Christiansen<br>5<br>(2010) | Denmark                   | DNRP,<br>incident<br>(hospitaliz<br>ed) MS | 1977-2006                | ICD-10, ICD-8<br>prior to 1993                | DNRP codes (NR)                                            | 521/13,963 =<br>3.73%                 | NR                                                      | NR                         | NR      | NR                                | NR      | 6/8              |

NR: Not Reported, DNRP- Danish National Registry of Patients
