# Supplementary material for: A systematic review of the incidence and prevalence of cardiac, cerebrovascular, and peripheral vascular disease in multiple sclerosis
Source: PubMed Central journal article supplement — Mult Scler. 2015 Mar;21(3):318–31. doi: 10.1177/1352458514564485 (PMC4404402; doi:10.1177/1352458514564485), 2015-03
Supplement: Supplemental_Table_7.pdf [file Supplemental_Table_7.pdf]

**Supplemental Table 7. Studies reporting the prevalence of hypertension in multiple sclerosis**

| Study (Year)                     | Region/ Sub-Region     | Source/ Population                                        | Prevalence Day/Period | Diagnostic Criteria: MS/ Established By         | Diagnostic Criteria: Hypertension/ Established By            | Crude Overall Prevalence (95%CI)                          | Age-Standardized Overall Prevalence (95%CI) | Crude Prevalence (95%CI) |         | Standardized Prevalence (95%CI) |         | Quality Score |
|----------------------------------|------------------------|-----------------------------------------------------------|-----------------------|-------------------------------------------------|--------------------------------------------------------------|-----------------------------------------------------------|---------------------------------------------|--------------------------|---------|---------------------------------|---------|---------------|
|                                  |                        |                                                           |                       |                                                 |                                                              |                                                           |                                             | Males                    | Females | Males                           | Females |               |
| Allen <sup>7</sup> (2008)        | United States/New York | SPARCS/ 95% of New York State acute care hospitalizations | 1988-2002             | ICD-9-CM 340.0 as secondary discharge diagnosis | ICD-9-CM 400-405 as primary or secondary discharge diagnosis | 1820/9,949 = 18.3%                                        | NR                                          | NR                       | NR      | NR                              | NR      | 4/8           |
| Buchanan <sup>16</sup> (2006)    | United States          | Randomly selected from NMSS membership                    | Oct 2004-Jan 2005     | Mailed Survey                                   | Telephone survey/ Mailed survey                              | Urban 27.4%<br>Adjacent rural 30.4%<br>Remote rural 23.1% | NR                                          | NR                       | NR      | NR                              | NR      | 2/9           |
| Christiansen <sup>5</sup> (2010) | Denmark                | DNRP, incident (hospitalized) MS                          | 1977-2006             | ICD-10 G35.9, ICD-8 340 (prior to 1993)         | DNRP codes (NR)                                              | At baseline 0/13,963 = 0%                                 | NR                                          | NR                       | NR      | NR                              | NR      | 6/8           |
| Fleming <sup>11</sup> (1994)     | United States          | Hospitalized Medicare MS                                  | 1989                  | ICD-9-CM code 340 or DRG 13                     | Administrative data code (code NR)                           | 7.42%                                                     | NR                                          | NR                       | NR      | NR                              | NR      | 4/8           |

|                                |                                               |                                                                                                              |                                 |                                                                |                                                                                                                                        |                                                                                |    |    |    |    |    |     |
|--------------------------------|-----------------------------------------------|--------------------------------------------------------------------------------------------------------------|---------------------------------|----------------------------------------------------------------|----------------------------------------------------------------------------------------------------------------------------------------|--------------------------------------------------------------------------------|----|----|----|----|----|-----|
|                                |                                               | population,<br>age ≥ 65<br>years                                                                             |                                 |                                                                |                                                                                                                                        |                                                                                |    |    |    |    |    |     |
| Fuvesi <sup>53</sup><br>(2010) | Hungary                                       | 3 outpatient<br>MS clinics<br>across<br>Hungary/co<br>nsecutive<br>patients<br>without<br>active<br>relapses | September<br>2003-April<br>2004 | Neurologist<br>diagnosed:<br>McDonald 2001                     | Survey/Self report                                                                                                                     | High blood<br>pressure<br>60/438 = 13.7%                                       | NR | NR | NR | NR | NR | 4/9 |
| Horton <sup>26</sup><br>(2010) | Canada/<br>Manitoba<br>United States/<br>Ohio | Participants<br>recruited<br>from 2<br>different MS<br>clinics                                               | Oct 2008-Oct<br>2009            | MacDonald<br>2005; diagnosed<br>by neurologist at<br>MS clinic | The Self-<br>Administered<br>Comorbidity<br>Questionnaire<br>(validated<br>questionnaire).<br>Validated by<br>medical records<br>data. | 69/404= 17.1%<br>by medical<br>records<br>76/404= 18.8%<br>by<br>questionnaire | NR | NR | NR | NR | NR | 5/8 |
| Holper <sup>54</sup><br>(2010) | Germany and<br>Switzerland                    | 2 inpatient<br>(47%) and 2<br>outpatient<br>(53%) MS<br>clinics/conv<br>enience                              | May 2007-<br>Feb 2008           | Neurologist<br>diagnosed:<br>McDonald 2005<br>or Poser         | SCQ                                                                                                                                    | 27/205 = 13.2%                                                                 | NR | NR | NR | NR | NR | 6/9 |

|                             |                |                                                                                                                  |                            |                                               |                                                                                                       |                  |    |    |    |    |    |     |
|-----------------------------|----------------|------------------------------------------------------------------------------------------------------------------|----------------------------|-----------------------------------------------|-------------------------------------------------------------------------------------------------------|------------------|----|----|----|----|----|-----|
|                             |                | sample of patients stratified to reflect MS forms                                                                |                            |                                               |                                                                                                       |                  |    |    |    |    |    |     |
| Hopman <sup>55</sup> (2007) | Canada/Ontario | MS Clinic of Kingston General Hospital, clinically definite MS, diagnosed for at least 12 months, MMSE $\geq$ 24 | September 2000-August 2001 | Neurologist diagnosed:<br>Criteria NR         | Self-report                                                                                           | 45/300 = 15.0%   | NR | NR | NR | NR | NR | 6/9 |
| Jadidi <sup>28</sup> (2013) | Sweden         | M&H Co Database                                                                                                  | 1987-2009                  | ICD-8<br>340<br>ICD-9<br>340<br>ICD-10<br>G35 | Administrative data codes                                                                             | 32/7,664 = 0.42% | NR | NR | NR | NR | NR | 5/8 |
| Kang <sup>8</sup> (2010)    | Taiwan         | NHIRD population, age $\geq$ 15 years                                                                            | 2007                       | ICD-9-CM code<br>340                          | ICD-9-CM<br>401.1, 401.9,<br>402.10, 402.90,<br>404.10, 404.90,<br>405.11, 405.19,<br>405.91, 405.99, | 144/898 = 16%    | NR | NR | NR | NR | NR | 4/8 |

|                                       |                                |                                                                                                   |                         |                                                 |                                                                                                                                |                                                                                              |    |                                                  |                                                      |    |    |     |
|---------------------------------------|--------------------------------|---------------------------------------------------------------------------------------------------|-------------------------|-------------------------------------------------|--------------------------------------------------------------------------------------------------------------------------------|----------------------------------------------------------------------------------------------|----|--------------------------------------------------|------------------------------------------------------|----|----|-----|
|                                       |                                |                                                                                                   |                         |                                                 | at least one hospitalization or two ambulatory claims                                                                          |                                                                                              |    |                                                  |                                                      |    |    |     |
| Khan <sup>9</sup><br>(2007)           | Australia/<br>Melbourne        | MS database<br>Royal<br>Melbourne<br>Hospital                                                     | Jan 2005-Feb<br>2005    | Neurologist<br>diagnosed: Poser<br>and Paty     | Self-report                                                                                                                    | 9/62 = 14.5%                                                                                 | NR | NR                                               | NR                                                   | NR | NR | 6/9 |
| LaVela <sup>10</sup><br>(2012)        | United States                  | National<br>cohort of<br>Veterans<br>with MS,<br>members of<br>veteran<br>service<br>organization | 2003, 2004              | Veterans<br>Benefits<br>Department<br>confirmed | Telephone and<br>mailed survey<br>(Multiple<br>Sclerosis- Health<br>Care Questionnaire<br>using questions<br>similar to BRFSS) | 533/ 1,142 =<br>46.7% (males<br>only)                                                        | NR | 46.7%                                            | NR                                                   | NR | NR | 4/8 |
| Lindegar<br>d <sup>32</sup><br>(1985) | Sweden                         | Native<br>Swedes born<br>1911-1940<br>in<br>Gothenburg                                            | 1970-1979               | ICD 340, 341<br>inpatient records               | ICD 400-404,<br>inpatient records                                                                                              | Young males<br>2.5%<br>Older males<br>5.7%<br>Young females<br>0.0%<br>Older females<br>4.3% | NR | Young<br>males<br>2.5%<br>Older<br>males<br>5.7% | Young<br>females<br>0.0%<br>Older<br>females<br>4.3% | NR | NR | 4/8 |
| Lu <sup>33</sup><br>(2013)            | Canada/<br>British<br>Columbia | British<br>Columbia<br>MS database                                                                | Apr 1998-<br>March 2009 | Poser,<br>McDonald 2005                         | Administrative<br>Data<br>“Hypertension                                                                                        | 33/432= 8%                                                                                   | NR | NR                                               | NR                                                   | NR | NR | 6/8 |

|                                                                             |                     |                                          |                                     |                                                                                                                                                 |                                                                                                                                                                    |                                                                                                 |                   |    |    |    |    |     |
|-----------------------------------------------------------------------------|---------------------|------------------------------------------|-------------------------------------|-------------------------------------------------------------------------------------------------------------------------------------------------|--------------------------------------------------------------------------------------------------------------------------------------------------------------------|-------------------------------------------------------------------------------------------------|-------------------|----|----|----|----|-----|
|                                                                             |                     |                                          |                                     |                                                                                                                                                 | (pre-existing, gestational, or pre-eclampsia)”                                                                                                                     |                                                                                                 |                   |    |    |    |    |     |
| Marrie <sup>35</sup><br>a<br>(2008)<br><br>Marrie <sup>51</sup><br>a (2011) | United States       | NARCOMS Registry population (volunteers) | October 2006                        | Self-report                                                                                                                                     | Online/Mailed Survey                                                                                                                                               | 2,664/8,844= 30.1%<br><br>At MS Onset: 322/8,581 = 3.8%<br><br>At MS Diagnosis: 688/8,581= 8.0% | NR                | NR | NR | NR | NR | 5/9 |
| Marrie <sup>34</sup><br>(2012)                                              | Canada/<br>Manitoba | Entire Manitoba population               | April 1, 1984-<br>March 31,<br>2007 | 1984–1997 all cases with ≥7 hospital or physician claims for MS. 1998-2007 all cases with ≥3 hospital, physician or prescription claims for MS. | CCDSS ICD-9 401-405, ICD-10 110-133,115 ATC codes: C02 (anti-hypertensives), C03 (diuretics), C07 (beta-blockers), C08 (calcium channel blockers), and C09 (agents | NR                                                                                              | 20.8% (19.1–22.5) | NR | NR | NR | NR | 8/8 |

|                              |        |                                                                                                           |                   |                                                        |                                         |                  |    |    |    |    |    |     |
|------------------------------|--------|-----------------------------------------------------------------------------------------------------------|-------------------|--------------------------------------------------------|-----------------------------------------|------------------|----|----|----|----|----|-----|
|                              |        |                                                                                                           |                   |                                                        | acting on the renin-angiotensin system) |                  |    |    |    |    |    |     |
| Sheu <sup>44</sup><br>(2013) | Taiwan | LHID 2000 Database of Taiwan, incident MS enrolled in registry of catastrophic illness, and age >18 years | Jan 2002-Dec 2009 | ICD-9-CM code 340 and certified by neurologist (Poser) | LHID Database. Codes not specified      | 69/316= 21.8%    | NR | NR | NR | NR | NR | 5/8 |
| Sun <sup>52</sup><br>(2013)  | Taiwan | NHIRD Incident MS cases diagnosed 1997-2010                                                               | 1997-2010         | ICD-9-CM code 340                                      | ICD-9-CM code 250                       | 103/1292 = 7.97% | NR | NR | NR | NR | NR | 5/8 |

|                                 |                          |                                                          |           |                                                       |                                                                                                                                                     |                |    |    |    |    |    |     |
|---------------------------------|--------------------------|----------------------------------------------------------|-----------|-------------------------------------------------------|-----------------------------------------------------------------------------------------------------------------------------------------------------|----------------|----|----|----|----|----|-----|
| Paz Soldan <sup>40</sup> (2012) | United States/ Minnesota | All MS patients living in Olmsted County in 2000         | 2000      | Poser                                                 | Medical Chart Review                                                                                                                                | 96/201 = 47.8% | NR | NR | NR | NR | NR | 6/8 |
| Warren <sup>4</sup> (2009)      | Canada                   | 98% of community dwelling Canadian population, ≥12 years | 2000/2001 | Self-report.<br>Interviews: In-person or by telephone | Interviews: In-person or by telephone<br><br>Diagnosed by a health-care professional and had lasted or would be expected to last more than 6 months | 17.0%          | NR | NR | NR | NR | NR | 5/9 |

NR: Not Reported, SPARCS: New York Department of Health Statewide Planning and Research Cooperative System, NMSS: National Multiple Sclerosis Society, NHIRD: National Health Insurance Research Database, NARCOMS: North American Research Committee on Multiple Sclerosis, LHID 2000 Database: Taiwan Longitudinal Health Insurance Database, BRFSS: Behavioral Risk Factor Surveillance System, SCQ: Self-administered Comorbidity Questionnaire.

a- Self-reported diagnoses of MS previously validated in random sample of study population against medical records and physician report; b – reported in another manuscript using the same study population
