# Supplementary material for: A systematic review of the incidence and prevalence of cardiac, cerebrovascular, and peripheral vascular disease in multiple sclerosis
Source: PubMed Central journal article supplement — Mult Scler. 2015 Mar;21(3):318–31. doi: 10.1177/1352458514564485 (PMC4404402; doi:10.1177/1352458514564485), 2015-03
Supplement: Supplemental_Table_8.pdf [file Supplemental_Table_8.pdf]

**Supplemental Table 8. The incidence and prevalence of hypertension in the multiple sclerosis population as compared to controls**

| Study (year)                     | MS, n  | Controls, n (matched)                                                    | Source of controls                                                                                    | Hypertension in MS                                                       | Hypertension in controls                                                | Comparison                                                           |
|----------------------------------|--------|--------------------------------------------------------------------------|-------------------------------------------------------------------------------------------------------|--------------------------------------------------------------------------|-------------------------------------------------------------------------|----------------------------------------------------------------------|
| <i>Incidence</i>                 |        |                                                                          |                                                                                                       |                                                                          |                                                                         |                                                                      |
| Christiansen <sup>5</sup> (2010) | 13,963 | 66,407 (yes: sex, age)                                                   | DNRP general population                                                                               | At 1 year:<br>0/13,963 = 0%<br>At 2-30yr follow-up:<br>521/13,963 = 3.7% | At 1 year:<br>0/66,407 = 0%<br>At 2-30yr follow-up:<br>521/4,666 = 7.0% | NR                                                                   |
| Jadidi <sup>28</sup> (2013)      | 7,664  | 66,215 (yes: sex, age)                                                   | Total Population Register of Sweden                                                                   | 32/7,664 = 0.42%                                                         | 447/66,214 = 0.68%                                                      | NR                                                                   |
| <i>Prevalence</i>                |        |                                                                          |                                                                                                       |                                                                          |                                                                         |                                                                      |
| Allen <sup>7</sup> (2008)        | 9,949  | 19,898 (yes: sex, age, race/ethnicity, insurance)                        | Hospitalization from SPARCS database of non-MS patients                                               | 1820/9,949 = 18.3%                                                       | 29.3%                                                                   | p<0.05                                                               |
| Fleming <sup>11</sup> (1994)     | 5384   | 5384 (yes: sex, age)                                                     | Medicare Population without history of MS                                                             | 7.42/100 = 7.42%                                                         | 15.95/100 = 15.9%                                                       | Statistically significant difference using X <sup>2</sup> (P < 0.05) |
| Kang <sup>8</sup> (2010)         | 898    | 4490 (yes: sex, age, monthly income level of urbanization in community ) | Randomly selected patients from the NHIRD                                                             | 144/898 = 16%                                                            | 575/4,490 = 12.8%                                                       | OR<br>1.4 (1.1-1.7)                                                  |
| Khan <sup>9</sup> (2007)         | 62     | 62 (no)                                                                  | Caregivers of MS participants                                                                         | 9/62 = 14.5%                                                             | 11/62 = 22.0%                                                           | NR                                                                   |
| LaVela <sup>10</sup> (2012)      | 1,142  | 31,500 (no)                                                              | Historical data from respondents to 2003 BRFSS: General Veteran U.S. Population with no history of MS | 533/ 1,142 = 46.7%                                                       | 12,978/ 31,500 = 13.6%                                                  | P< 0.001                                                             |
| Lindgard <sup>32</sup> (1985)    | 351    | 159,200 (no)                                                             | General Hospital in-patient hospitalization within the city of Gothenburg, Sweden                     | Young males<br>2.5%                                                      | NR                                                                      | p >0.05                                                              |

|                                |      |                                                                                              |                                     |                       |                    |                                                                                                                   |
|--------------------------------|------|----------------------------------------------------------------------------------------------|-------------------------------------|-----------------------|--------------------|-------------------------------------------------------------------------------------------------------------------|
|                                |      |                                                                                              |                                     | Older males<br>5.7%   |                    |                                                                                                                   |
|                                |      |                                                                                              |                                     | Young females<br>0.0% |                    |                                                                                                                   |
|                                |      |                                                                                              |                                     | Older females<br>4.3% |                    |                                                                                                                   |
| Lu <sup>33</sup><br>(2013)     | 432  | 2,975 (yes: frequency-matched sample by maternal age, local health authority, delivery year) | Female patients from the BCPDR      | 33/432= 8%            | 157/2,975= 5%      | P=0.046 X <sup>2</sup> test                                                                                       |
| Marrie <sup>34</sup><br>(2012) | 430  | 20,940 (yes: sex, age, region)                                                               | Manitoba Health Population Registry | 20.8% (19.1–22.5%)    | 22.5% (21.7–23.3%) | Significantly lower in the MS population from 1985-2004 (PR 0.85; 0.80–0.89) but not in 2005 (PR 0.91; 0.78–1.06) |
| Sheu <sup>44</sup><br>(2013)   | 326  | 1580 (yes: sex, age, index year)                                                             | LHID 2000 Database of Taiwan        | 69/316= 21.8%         | 242/1580= 15.3%    | P=0.004                                                                                                           |
| Sun <sup>14</sup><br>(2013)    | 1292 | 5168 (Yes: age, sex, index year)                                                             | NHIRD without history of MS         | 103/1292 = 7.97%      | 105/5168 = 2.03%   | P< 0.0001                                                                                                         |

NR: Not Reported, OR: Odds Ratio, SPARCS: New York Department of Health Statewide Planning and Research Cooperate System, DNRP: Danish National Registry of Patients, NHIRD: National Health Insurance Research Database, BCPDR: British Columbia Perinatal Database Registry, LHID 2000 Database: Taiwan Longitudinal Health Insurance Database, BRFSS: Behavioral Risk Factor Surveillance System
