# Supplementary material for: A systematic review of the incidence and prevalence of cardiac, cerebrovascular, and peripheral vascular disease in multiple sclerosis
Source: PubMed Central journal article supplement — Mult Scler. 2015 Mar;21(3):318–31. doi: 10.1177/1352458514564485 (PMC4404402; doi:10.1177/1352458514564485), 2015-03
Supplement: Supplemental_Table_9.pdf [file Supplemental_Table_9.pdf]

**Supplemental Table 9. Studies reporting the incidence of cardiac arrhythmias in multiple sclerosis**

| Study (Year)                     | Region/ Sub-Region | Source/ Population               | Prevalence Day/Period | Diagnostic Criteria: MS/ Established By | Diagnostic Criteria: Cardiac Arrhythmias/ Established By | Crude Overall Incidence (95% CI)                                                   | Age-Standardized Overall Incidence (95% CI) | Crude Incidence (95% CI) |                 | Standardized Incidence (95% CI) |         | Quality Score |     |     |
|----------------------------------|--------------------|----------------------------------|-----------------------|-----------------------------------------|----------------------------------------------------------|------------------------------------------------------------------------------------|---------------------------------------------|--------------------------|-----------------|---------------------------------|---------|---------------|-----|-----|
|                                  |                    |                                  |                       |                                         |                                                          |                                                                                    |                                             | Males                    | Females         | Males                           | Females |               |     |     |
| Christiansen <sup>3</sup> (2010) | Denmark            | DNRP, incident (hospitalized) MS | 1977-2006             | ICD-10 G35.9, ICD-8 340 (prior to 1993) | ICD-8 427.93, 427.94 ICD-10 I48                          | 1 year follow-up<br>11/13,963 = 0.079%<br>2-30 year follow-up<br>162/13,963 = 1.2% | NR                                          | NR                       | NR              | NR                              | NR      | NR            | 6/8 |     |
| Jadidi <sup>4</sup> (2013)       | Sweden             | M&H Co Database, incident MS     | 1987-2009             | ICD-8: 340; ICD-9: 340; ICD-10: G35     | ICD-8: 427.4; ICD-9: 427.3; ICD-10: I48                  | 42/7,664 = 0.55%                                                                   | NR                                          | 19/2449 = 0.78%          | 23/5215 = 0.44% | NR                              | NR      | NR            | NR  | 5/8 |

NR: Not Reported, DNRP: Danish National Registry of Patients, M&H Co Database: Migration and Health Cohort Database (contains over 15 linkable Swedish national registers).
