# Supplementary material for: A systematic review of the incidence and prevalence of cardiac, cerebrovascular, and peripheral vascular disease in multiple sclerosis
Source: PubMed Central journal article supplement — Mult Scler. 2015 Mar;21(3):318–31. doi: 10.1177/1352458514564485 (PMC4404402; doi:10.1177/1352458514564485), 2015-03
Supplement: Supplemental_Table_13.pdf [file Supplemental_Table_13.pdf]

**Supplemental Table 13. Studies reporting the prevalence of cardiac valvular disease in multiple sclerosis**

| Study<br>(Year)                     | Region/<br>Sub-<br>Region | Source/<br>Population                     | Prevalence<br>Day/Period | Diagnostic<br>Criteria: MS/<br>Established By | Diagnostic<br>Criteria:<br>Valvular Disease/<br>Established By | Crude Overall<br>Prevalence<br>(95%CI) | Age-<br>Standardized<br>Overall<br>Prevalence<br>/100,000<br>(95%CI) | Crude Prevalence<br>/100,000<br>(95%CI) |         | Standardized<br>Prevalence<br>(95%CI)/100,000 |         | Quality<br>Score |
|-------------------------------------|---------------------------|-------------------------------------------|--------------------------|-----------------------------------------------|----------------------------------------------------------------|----------------------------------------|----------------------------------------------------------------------|-----------------------------------------|---------|-----------------------------------------------|---------|------------------|
|                                     |                           |                                           |                          |                                               |                                                                |                                        |                                                                      | Males                                   | Females | Males                                         | Females |                  |
| Christiansen <sup>5</sup><br>(2010) | Denmark                   | DNRP,<br>incident<br>(hospitalized)<br>MS | 1977-2006                | ICD-10 G35.9,<br>ICD-8 340 (prior<br>to 1993) | DNRP codes (NR)                                                | At baseline<br>0/13,963 =<br>0.0%      | NR                                                                   | NR                                      | NR      | NR                                            | NR      | 6/8              |
| Jadidi <sup>28</sup><br>(2013)      | Sweden                    | M&H Co<br>Database,<br>incident MS        | 1987-2009                | ICD-8: 340;<br>ICD-9: 340;<br>ICD-10: G35     | ICD-8<br>427.0, 427.1<br>ICD-9<br>428<br>ICD-10<br>I50         | 11/7,664 =<br>0.14%                    | NR                                                                   | NR                                      | NR      | NR                                            | NR      | 5/8              |

NR: Not Reported, DNRP: Danish National Registry of Patients, M&H Co: Migration and Health Cohort Database (contains over 15 linkable Swedish national registers).
