# Supplementary material for: A systematic review of the incidence and prevalence of cardiac, cerebrovascular, and peripheral vascular disease in multiple sclerosis
Source: PubMed Central journal article supplement — Mult Scler. 2015 Mar;21(3):318–31. doi: 10.1177/1352458514564485 (PMC4404402; doi:10.1177/1352458514564485), 2015-03
Supplement: Supplemental_Table_14.pdf [file Supplemental_Table_14.pdf]

**Supplemental Table 14. The prevalence of cardiac valvular disease in the multiple sclerosis population as compared to controls**

| Study (year)                     | MS, n  | Controls, n (matched)  | Source of controls                  | Valvular disease in MS                                                  | Valvular disease in controls                                             | Comparison                                       |
|----------------------------------|--------|------------------------|-------------------------------------|-------------------------------------------------------------------------|--------------------------------------------------------------------------|--------------------------------------------------|
| Christiansen <sup>5</sup> (2010) | 13,963 | 66,407 (yes: sex, age) | DNRP general population             | At baseline<br>0/13,963 = 0.0%<br>At 2-30 follow-up<br>94/13,963 = 0.7% | At baseline<br>6/66,407 <0.01%<br>At 2-30 follow-up<br>737/66,407 = 1.1% | P (baseline) >0.05*<br><br>P (follow-up) <0.001* |
| Jadidi <sup>28</sup> (2013)      | 7,664  | 66,215 (yes: sex, age) | Total Population Register of Sweden | 11/7,664 = 0.14%                                                        | 182/66,215 = 0.27%                                                       | P = 0.044*                                       |

NR: Not Reported DNRP: Danish National Registry of Patients \*calculated from numbers provided in manuscript
