# Supplementary material for: A systematic review of the incidence and prevalence of cardiac, cerebrovascular, and peripheral vascular disease in multiple sclerosis
Source: PubMed Central journal article supplement — Mult Scler. 2015 Mar;21(3):318–31. doi: 10.1177/1352458514564485 (PMC4404402; doi:10.1177/1352458514564485), 2015-03
Supplement: Supplemental_Table_15.pdf [file Supplemental_Table_15.pdf]

**Supplemental Table 15. Studies reporting the incidence of ischemic heart disease in multiple sclerosis**

| Study<br>(Year)                     | Region/<br>Sub-<br>Region | Source/<br>Population                                        | Prevalence<br>Day/Period | Diagnostic Criteria:<br>MS/ Established By                                                                              | Diagnostic<br>Criteria:<br>Ischemic Heart<br>Disease/<br>Established By                              | Crude Overall<br>Incidence<br>(95%CI)                                   | Age-<br>Standardize<br>d Overall<br>Incidence<br>(95%CI) | Crude Incidence<br>(95%CI) |                          | Standardized Incidence<br>(95%CI) |                      | Quality<br>Score |
|-------------------------------------|---------------------------|--------------------------------------------------------------|--------------------------|-------------------------------------------------------------------------------------------------------------------------|------------------------------------------------------------------------------------------------------|-------------------------------------------------------------------------|----------------------------------------------------------|----------------------------|--------------------------|-----------------------------------|----------------------|------------------|
|                                     |                           |                                                              |                          |                                                                                                                         |                                                                                                      |                                                                         |                                                          | Males                      | Females                  | Males                             | Females              |                  |
| Christiansen <sup>5</sup><br>(2010) | Denmark                   | DNRP,<br>incident<br>(hospitalize<br>d) MS                   | 1977-2006                | ICD-10, ICD-8<br>prior to 1993                                                                                          | Myocardial<br>infarction:<br>ICD-8 410<br>ICD-10 I21                                                 | 1 year:<br>30/13,963 =<br>0.21%<br>2-30 years:<br>299/13,963 =<br>2.14% | NR                                                       | NR                         | NR                       | NR                                | NR                   | 6/8              |
| Jadidi <sup>28</sup><br>(2013)      | Sweden                    | M&H Co<br>Database,<br>incident<br>MS                        | 1987-2009                | ICD-8: 340; ICD-9:<br>340; ICD-10: G35                                                                                  | Myocardial<br>infarction:<br>ICD-8: 410;<br>ICD-10: I21                                              | 211/7,664 =<br>2.75%                                                    | NR                                                       | 102/2,44<br>9 =<br>4.16%   | 109/5,21<br>5 =<br>2.09% | NR                                | NR                   | 5/8              |
| Marrie <sup>57</sup><br>(2013)      | Canada/<br>Manitoba       | Administra<br>tive data,<br>entire<br>Manitoba<br>population | 1984-2005                | Hospital, physician<br>and prescription<br>claims submitted to<br>Manitoba<br>Health/ICD-9-CM<br>and ICD-10-CA<br>codes | ICD-9/10 codes<br>(410–414, I20–<br>I25)<br>≥1 hospital or<br>≥2 physician<br>claims over 5<br>years | 82/ 1,684,843<br>person-years =<br>0.49%                                | 0.75% (0.34–<br>1.17)                                    | NR                         | NR                       | 0.88%<br>(0.65-1.19)              | 0.30%<br>(0.22-0.41) | 8/8              |

NR: Not Reported, DNRP: Danish National Registry of Patients, M&H Co Database: Migration and Health Cohort Database (contains over 15 linkable Swedish national registers).
