# Supplementary material for: A systematic review of the incidence and prevalence of cardiac, cerebrovascular, and peripheral vascular disease in multiple sclerosis
Source: PubMed Central journal article supplement — Mult Scler. 2015 Mar;21(3):318–31. doi: 10.1177/1352458514564485 (PMC4404402; doi:10.1177/1352458514564485), 2015-03
Supplement: Supplemental_Table_16.pdf [file Supplemental_Table_16.pdf]

**Supplemental Table 16. Studies reporting the prevalence of ischemic heart disease in multiple sclerosis**

| Study (Year)                 | Region/ Sub-Region      | Source/ Population                                        | Prevalence Day/Period      | Diagnostic Criteria: MS/ Established By                       | Diagnostic Criteria: Ischemic Heart Disease/ Established By          | Crude Overall Prevalence (95% CI)                         | Age-Standardized Overall Prevalence (95% CI) | Crude Prevalence (95% CI) |                   | Standardized Prevalence (95% CI) |         | Quality Score |
|------------------------------|-------------------------|-----------------------------------------------------------|----------------------------|---------------------------------------------------------------|----------------------------------------------------------------------|-----------------------------------------------------------|----------------------------------------------|---------------------------|-------------------|----------------------------------|---------|---------------|
|                              |                         |                                                           |                            |                                                               |                                                                      |                                                           |                                              | Males                     | Females           | Males                            | Females |               |
| Allen <sup>7</sup> (2008)    | United States/ New York | SPARCS/ 95% of New York State acute care hospitalizations | 1988-2002                  | ICD-9-CM 340.0 as secondary discharge diagnosis               | IHD ICD-9-CM 410-414 MI ICD-9-CM 410/ as primary discharge diagnosis | IHD 355/9,949 = 3.57%<br><br>MI 142/9,949 = 1.43%         | NR                                           | NR                        | NR                | NR                               | NR      | 4/8           |
| Fleming <sup>11</sup> (1994) | United States           | Hospitalized Medicare MS population, age ≥ 65 years       | 1989                       | ICD-9-CM code 340 as primary or secondary discharge diagnosis | Administrative data code (code NR)                                   | Angina: 1.38%<br><br>Chronic IHD: 0.70%<br><br>Both 3.08% | NR                                           | NR                        | NR                | NR                               | NR      | 4/8           |
| Fromont <sup>23</sup> (2013) | France                  | Whole population                                          | Oct 31, 1995- Oct 31, 2004 | Neurologist, ALD status 25                                    | ALD 3 chronic                                                        | 92/21,119 = 16.2%                                         | NR                                           | 38/5,620 = 20.2%          | 54/15,499 = 14.2% | NR                               | NR      | 7/8           |

|                                 |                                               |                                                                     |                   |                                                                                         |                                                                                                    |                                                                                              |    |    |    |    |    |     |
|---------------------------------|-----------------------------------------------|---------------------------------------------------------------------|-------------------|-----------------------------------------------------------------------------------------|----------------------------------------------------------------------------------------------------|----------------------------------------------------------------------------------------------|----|----|----|----|----|-----|
|                                 |                                               | of newly diagnosed MS patients with ALD status before age 45 years  |                   |                                                                                         | arteriopathy with ischemic expression<br>ALD 13<br>coronary disease                                |                                                                                              |    |    |    |    |    |     |
| Horton <sup>26</sup><br>(2010)  | Canada/<br>Manitoba<br>United States/<br>Ohio | Participants recruited from 2 different MS clinics                  | Oct 2008-Oct 2009 | MacDonald 2005; diagnosed by neurologist at MS clinic                                   | The Self-Administered Comorbidity Questionnaire (questionnaire validated against medical records). | Heart disease: 11/404= 2.7%<br>by medical records review,<br>17/404 = 4.2%<br>by self-report | NR | NR | NR | NR | NR | 5/8 |
| Kang <sup>8</sup><br>(2010)     | Taiwan                                        | NHIRD population, age ≥15 years                                     | 2007              | At least two claims with ICD-9-CM code 340 in 2007, under care of certified neurologist | ICD-9-CM 410-412 at one hospital or two ambulatory claims                                          | 7/898 = 0.78%                                                                                | NR | NR | NR | NR | NR | 4/8 |
| Kanjwal <sup>29</sup><br>(2010) | United States/<br>Toledo, Ohio                | Patients followed up at the University of Toledo Autonomic Disorder | 1998-2008         | Neurologist (criteria not specified)                                                    | Medical chart review/physician letters review                                                      | 2/9= 22.2%                                                                                   | NR | NR | NR | NR | NR | 3/8 |

|                                   |                         |                                                                                                           |                      |                                                                                                      |                                                                                                                                |                        |                        |                                                   |                                                      |                          |                          |     |
|-----------------------------------|-------------------------|-----------------------------------------------------------------------------------------------------------|----------------------|------------------------------------------------------------------------------------------------------|--------------------------------------------------------------------------------------------------------------------------------|------------------------|------------------------|---------------------------------------------------|------------------------------------------------------|--------------------------|--------------------------|-----|
|                                   |                         | Center                                                                                                    |                      |                                                                                                      |                                                                                                                                |                        |                        |                                                   |                                                      |                          |                          |     |
| Khan <sup>9</sup><br>(2007)       | Australia/<br>Melbourne | MS database<br>Royal<br>Melbourne<br>Hospital                                                             | Jan 2005-Feb<br>2005 | Neurologist<br>diagnosed: Poser<br>and Paty                                                          | Self-report                                                                                                                    | 2/62 = 3.23%           | NR                     | NR                                                | NR                                                   | NR                       | NR                       | 3/9 |
| LaVela <sup>10</sup><br>(2012)    | United States           | National<br>cohort of<br>male<br>Veterans<br>with MS,<br>members of<br>veteran<br>service<br>organization | 2003, 2004           | Veterans<br>Benefits<br>Department<br>confirmed                                                      | Telephone and<br>mailed survey<br>(Multiple<br>Sclerosis- Health<br>Care Questionnaire<br>using questions<br>similar to BRFSS) | NR                     | NR                     | 120/<br>1,142 =<br>10.5%                          | NR                                                   | NR                       | NR                       | 4/8 |
| Lindegard <sup>32</sup><br>(1985) | Sweden                  | Native<br>Swedes born<br>1911-1940<br>in<br>Gothenburg                                                    | 1970-1979            | ICD 340, 341<br>inpatient records                                                                    | MI<br>ICD 410, 412                                                                                                             | NR                     | NR                     | Young<br>males<br>5.7%<br>Older<br>males<br>12.7% | Young<br>females<br>0.0%<br>Older<br>females<br>7.4% | NR                       | NR                       | 4/8 |
| Marrie <sup>57</sup><br>(2013)    | Canada/<br>Manitoba     | Administrati<br>ve data,<br>entire<br>Manitoba<br>population                                              | 1984-2005            | 1984–1997 all<br>cases with ≥7<br>hospital or<br>physician claims<br>for MS. 1998-<br>2007 all cases | ICD-9/10 codes<br>410–414, I20–I25/<br>≥1 hospital or ≥2<br>physician claims<br>over 5 years                                   | 5.90% (4.94–<br>7.05%) | 6.77% (5.48–<br>8.07%) | NR                                                | NR                                                   | 12.3%<br>(9.69-<br>15.7) | 3.70%<br>(2.85-<br>4.79) | 8/8 |

|                               |             |                                                                                                           |                   |                                                                       |                                                                  |               |    |    |    |    |    |     |
|-------------------------------|-------------|-----------------------------------------------------------------------------------------------------------|-------------------|-----------------------------------------------------------------------|------------------------------------------------------------------|---------------|----|----|----|----|----|-----|
|                               |             |                                                                                                           |                   | with $\geq 3$ hospital, physician or prescription claims for MS.      |                                                                  |               |    |    |    |    |    |     |
| Nuyen <sup>39</sup><br>(2006) | Netherlands | DNSGP                                                                                                     | 2001              | ICPC code N86                                                         | Consultation with GP (1-year period).<br>ICPC K74, K75, K76, K77 | 2/241 = 0.83% | NR | NR | NR | NR | NR | 5/8 |
| Sheu <sup>44</sup><br>(2013)  | Taiwan      | LHID 2000 Database of Taiwan, incident MS enrolled in registry of catastrophic illness, and age >18 years | Jan 2002-Dec 2009 | LHID Database. ICD-9-CM code 340 and certified by neurologist (Poser) | LHID Database. Codes not specified                               | 31/316= 9.8%  | NR | NR | NR | NR | NR | 5/8 |

NR: Not Reported, IHD: Ischemic Heart Disease, MI: Myocardial Infraction, SPARCS: New York Department of Health Statewide Planning and Research Cooperate System, ALD:

Affections de Longue Duree, NHIRD: National Health Insurance Research Database, DNSGP: Dutch National Survey of General Practice, GP: General Practitioner, LHID 2000 Database:

Taiwan Longitudinal Health Insurance Database, BRFSS = Behavioral Risk Factor Surveillance System
