# Supplementary material for: A systematic review of the incidence and prevalence of cardiac, cerebrovascular, and peripheral vascular disease in multiple sclerosis
Source: PubMed Central journal article supplement — Mult Scler. 2015 Mar;21(3):318–31. doi: 10.1177/1352458514564485 (PMC4404402; doi:10.1177/1352458514564485), 2015-03
Supplement: Supplemental_Table_17.pdf [file Supplemental_Table_17.pdf]

**Supplemental Table 17. The incidence and prevalence of ischemic heart disease in the multiple sclerosis population as compared to controls**

| <b>Study (year)</b>              | <b>MS, n</b> | <b>Controls, n (matched)</b> | <b>Source of controls</b>                               | <b>Ischemic heart disease in MS</b>                                       | <b>Ischemic heart disease in controls</b>                                   | <b>Comparison MS: Controls</b>                                       |
|----------------------------------|--------------|------------------------------|---------------------------------------------------------|---------------------------------------------------------------------------|-----------------------------------------------------------------------------|----------------------------------------------------------------------|
| <i>Incidence</i>                 |              |                              |                                                         |                                                                           |                                                                             |                                                                      |
| Christiansen <sup>5</sup> (2010) | 13,963       | 66,407 (yes: sex, age)       | DNRP general population                                 | MI<br>1 year:<br>30/13,963 = 0.21%<br>2-30 years:<br>299/13,963 = 2.14%   | MI<br>1 year<br>78/66,407 = 0.12%<br>2-30 years<br>2,082/66,407 = 3.13%     | IRR<br>1 year<br>1.84 (1.28-2.65)<br>2-30 years<br>1.10 (0.97-1.24)  |
| Jadidi <sup>28</sup> (2013)      | 7,664        | 66,215 (yes: sex, age)       | Total Population Register of Sweden                     | MI<br>211/7,664 = 2.75%                                                   | MI<br>880/66,214 = 1.33%                                                    | IRR<br>1.85 (1.50-2.16)                                              |
| Marrie <sup>57</sup> (2013)      | 2,366        | (yes: sex, age, region)      | Manitoba Health Population Registry                     | Age standardized incidence:<br>0.75% (0.34–1.17)                          | Age standardized incidence:<br>0.44% (0.29–0.58)                            | IRR<br>1.24 (0.97-1.59)                                              |
| <i>Prevalence</i>                |              |                              |                                                         |                                                                           |                                                                             |                                                                      |
| Allen <sup>7</sup> (2008)        | 9,949        | 19,898 (no)                  | Hospitalization from SPARCS database of non-MS patients | IHD<br>355/9,949 = 3.57%<br>MI<br>142/9,949 = 1.43%                       | IHD<br>1,422/18,898 = 7.15%<br>MI<br>403/18,898 = 2.03%                     | OR<br>IHD<br>0.58 (0.51–0.66)<br>MI<br>0.78 (0.64–0.96)              |
| Christiansen <sup>5</sup> (2010) | 13,963       | 66,407 (yes: sex, age)       | DNRP general population                                 | 1 year<br>30/13,963 = 2.15%<br>2-30 years follow-up<br>299/13,963 = 2.14% | 1 year<br>78/66,407 = 0.12%<br>2-30 years follow-up<br>2,082/66,407 = 3.14% | IRR<br>1 year<br>1.84 (1.28–2.65)<br>2-30 years:<br>1.10 (0.97–1.24) |
| Fleming <sup>11</sup>            | 5384         | 5384 (yes: sex, age)         | Medicare Population without history of                  | 0.70%                                                                     | 2.22%                                                                       | Statistically significant                                            |

|                                  |       |                                                                           |                                                                                                       |                                                                                                     |                                    |                                                                                                                                                                                                            |
|----------------------------------|-------|---------------------------------------------------------------------------|-------------------------------------------------------------------------------------------------------|-----------------------------------------------------------------------------------------------------|------------------------------------|------------------------------------------------------------------------------------------------------------------------------------------------------------------------------------------------------------|
| (1994)                           |       |                                                                           | MS                                                                                                    |                                                                                                     |                                    | difference using $X^2$ ( $P < 0.05$ )                                                                                                                                                                      |
| Jadidi <sup>28</sup><br>(2013)   | 7,664 | 66,215 (yes: sex, age)                                                    | Total Population Register of Sweden                                                                   | 211/7,664 = 2.75%                                                                                   | 880/66,215 = 1.33%                 | IRR<br>1.85 (1.5–2.16)                                                                                                                                                                                     |
| Kang <sup>8</sup><br>(2010)      | 898   | 4,490 (yes: sex, age, monthly income, level of urbanization in community) | Randomly matched patients from the NHIRD                                                              | 7/898 = 0.78%                                                                                       | 9/4,490 = 0.20%                    | NA                                                                                                                                                                                                         |
| Khan <sup>9</sup><br>(2007)      | 62    | 62 (no)                                                                   | Caregivers of MS participants                                                                         | 2/62 = 3.23%                                                                                        | 1/62 = 1.61%                       | NR                                                                                                                                                                                                         |
| LaVela <sup>10</sup><br>(2012)   | 1,142 | 31,500 (no)                                                               | Historical data from respondents to 2003 BRFSS: General Veteran U.S. Population with no history of MS | 120/ 1,142 = 10.5%                                                                                  | 3,622/31,500 = 11.5%               | $P < 0.001$                                                                                                                                                                                                |
| Lindgard <sup>32</sup><br>(1985) | 351   | 159,200 (yes: sex, age)                                                   | General Hospital in-patient hospitalization within the city of Gothenburg, Sweden                     | MI<br>Young males<br>5.7%<br>Older males<br>12.7%<br>Young females<br>0.0%<br>Older females<br>7.4% | NR                                 | Young males<br>MS patients 6 times more likely than controls ( $P < 0.001$ )<br>Older males<br>NA<br>Young females<br>NA<br>Older females<br>MS patients 4 times more likely than controls ( $P < 0.001$ ) |
| Marrie <sup>57</sup><br>(2013)   | 2,366 | 11,786 (yes: sex, age, region)                                            | Manitoba Health Population Registry                                                                   | IHD<br>Age standardized prevalence:                                                                 | IHD<br>Age standardized prevalence | NR                                                                                                                                                                                                         |

|                              |     |                                     |                              |                   |                   |         |
|------------------------------|-----|-------------------------------------|------------------------------|-------------------|-------------------|---------|
|                              |     |                                     |                              | 6.77% (5.48–8.07) | 6.11% (5.56–6.66) |         |
| Sheu <sup>44</sup><br>(2013) | 326 | 1580 (yes: sex, age,<br>index year) | LHID 2000 Database of Taiwan | 31/316= 9.8%      | 87/1580= 5.5%     | P=0.004 |

NR: Not Reported, IHD: Ischemic Heart Disease, MI: Myocardial Infraction, OR: Odds Ratio, N/A: No Association, SPARCS: New York Department of Health Statewide Planning and Research Cooperate System, DNRP: Danish National Registry of Patients, NHIRD: National Health Insurance Research Database, LHID 2000 Database: Taiwan Longitudinal Health Insurance Database, BRFSS: Behavioral Risk Factor Surveillance System
