# Supplementary material for: A systematic review of the incidence and prevalence of cardiac, cerebrovascular, and peripheral vascular disease in multiple sclerosis
Source: PubMed Central journal article supplement — Mult Scler. 2015 Mar;21(3):318–31. doi: 10.1177/1352458514564485 (PMC4404402; doi:10.1177/1352458514564485), 2015-03
Supplement: Supplemental_Table_18.pdf [file Supplemental_Table_18.pdf]

**Supplemental Table 18. Studies reporting the incidence of congestive heart failure in multiple sclerosis**

| Study (Year)                     | Region/ Sub-Region | Source/ Population               | Prevalence Day/Period | Diagnostic Criteria: MS/ Established By | Diagnostic Criteria: CHF/ Established By                                  | Crude Overall Incidence (95%CI)                                                 | Age-Standardized Overall Incidence (95%CI) | Crude Incidence (95%CI) |                 | Standardized Incidence (95%CI) |         | Quality Score |     |     |
|----------------------------------|--------------------|----------------------------------|-----------------------|-----------------------------------------|---------------------------------------------------------------------------|---------------------------------------------------------------------------------|--------------------------------------------|-------------------------|-----------------|--------------------------------|---------|---------------|-----|-----|
|                                  |                    |                                  |                       |                                         |                                                                           |                                                                                 |                                            | Males                   | Females         | Males                          | Females |               |     |     |
| Christiansen <sup>5</sup> (2010) | Denmark            | DNRP, incident (hospitalized) MS | 1977-2006             | ICD-10 G35.9, ICD-8 340 (prior to 1993) | ICD-8: 427.09, 427.10, 427.11, 427.19<br>ICD-10: I50, I11.0, I13.0, I13.2 | 1 year follow-up: 23/13,963 = 0.16%<br>2-30 years follow-up: 376/13,963 = 2.69% | NR                                         | NR                      | NR              | NR                             | NR      | NR            | 6/8 |     |
| Jadidi <sup>28</sup> (2013)      | Sweden             | M&H Co Database, incident MS     | 1987-2009             | ICD-8: 340; ICD-9: 340; ICD-10: G35     | ICD-8: 427.0, 427.1; ICD-9: 428; ICD-10: I50                              | 68/7,664 = 0.89%                                                                | NR                                         | 26/5215 = 0.50%         | 49/2449 = 2.00% | NR                             | NR      | NR            | NR  | 5/8 |

NR: Not Reported, DNRP- Danish National Registry of Patients, M&H Co Database: Migration and Health Cohort Database (contains over 15 linkable Swedish national registers).
