# Supplementary material for: A systematic review of the incidence and prevalence of cardiac, cerebrovascular, and peripheral vascular disease in multiple sclerosis
Source: PubMed Central journal article supplement — Mult Scler. 2015 Mar;21(3):318–31. doi: 10.1177/1352458514564485 (PMC4404402; doi:10.1177/1352458514564485), 2015-03
Supplement: Supplemental_Table_19.pdf [file Supplemental_Table_19.pdf]

**Supplemental Table 19. Studies reporting the prevalence of congestive heart failure in multiple sclerosis**

| Study (Year)                 | Region/ Sub-Region | Source/ Population                            | Prevalence Day/Period | Diagnostic Criteria: MS/ Established By                                         | Diagnostic Criteria: CHF/ Established By                                                                                           | Crude Overall Prevalence (95% CI) | Age-Standardized Overall Prevalence (95% CI) | Crude Prevalence (95% CI) |         | Standardized Prevalence (95% CI) |         | Quality Score |
|------------------------------|--------------------|-----------------------------------------------|-----------------------|---------------------------------------------------------------------------------|------------------------------------------------------------------------------------------------------------------------------------|-----------------------------------|----------------------------------------------|---------------------------|---------|----------------------------------|---------|---------------|
|                              |                    |                                               |                       |                                                                                 |                                                                                                                                    |                                   |                                              | Males                     | Females | Males                            | Females |               |
| Fleming <sup>11</sup> (1994) | United States      | Hospitalized Medicare MS population ≥65 years | 1989                  | ICD-9-CM: 340 listed as primary or secondary discharge diagnosis                | Administrative data code DRG 127                                                                                                   | 5.39%                             | NR                                           | NR                        | NR      | NR                               | NR      | 4/8           |
| Kang <sup>8</sup> (2010)     | Taiwan             | NHIRD population, age >15 years               | 2007                  | At least two claims with ICD-9-CM code 340, under care of certified neurologist | ICD-9-CM 398.91, 402.11, 402.91, 404.11, 404.13, 404.91, 404.93, 428.0-428.9 at least one hospitalization or two ambulatory claims | 16/898 = 1.8%                     | NR                                           | NR                        | NR      | NR                               | NR      | 4/8           |

NR: Not Reported, DNRP: Danish National Registry of Patients, NHIRD: National Health Insurance Research Database.
