# Supplementary material for: A systematic review of the incidence and prevalence of cardiac, cerebrovascular, and peripheral vascular disease in multiple sclerosis
Source: PubMed Central journal article supplement — Mult Scler. 2015 Mar;21(3):318–31. doi: 10.1177/1352458514564485 (PMC4404402; doi:10.1177/1352458514564485), 2015-03
Supplement: Supplemental_Table_20.pdf [file Supplemental_Table_20.pdf]

**Supplemental Table 20. The incidence and prevalence of congestive heart failure in the multiple sclerosis population as compared to controls**

| Study (year)                     | MS, n  | Controls, n (matched)                                                   | Source of controls                        | CHF in MS                                                 | CHF in controls                                             | Comparison                                                         |
|----------------------------------|--------|-------------------------------------------------------------------------|-------------------------------------------|-----------------------------------------------------------|-------------------------------------------------------------|--------------------------------------------------------------------|
| <i>Incidence</i>                 |        |                                                                         |                                           |                                                           |                                                             |                                                                    |
| Christiansen <sup>5</sup> (2010) | 13,963 | 66,407 (yes: sex, age)                                                  | DNRP general population                   | 1 year<br>23/13,963<br>2-30 years follow-up<br>376/13,963 | 1 year<br>42/66,407<br>2-30 years follow-up<br>2,185/66,407 | IRR<br>1 year<br>1.84 (1.28–2.65)<br>2-30 yrs:<br>1.10 (0.97–1.24) |
| Jadidi <sup>28</sup> (2013)      | 7,664  | 66,215 (yes: sex, age)                                                  | Total Population Register of Sweden       | 68/7,664                                                  | 269/66,215                                                  | IRR<br>1.98 (1.52–2.56)                                            |
| <i>Prevalence</i>                |        |                                                                         |                                           |                                                           |                                                             |                                                                    |
| Fleming <sup>11</sup> (1994)     | 5,384  | 5384 (yes: sex, age)                                                    | Medicare Population without history of MS | 5.39/100                                                  | 11.82/100                                                   | P < 0.05                                                           |
| Kang <sup>8</sup> (2010)         | 898    | 4490 (yes: sex, age, monthly income level of urbanization in community) | Randomly matched patients from the NHIRD  | 16/898 (1.8%)                                             | 40/4490 (0.9%)                                              | OR<br>2.1(1.1-3.7)                                                 |

OR: Odds Ratio, IRR: Incidence Rate Ratio, DNRP: Danish National Registry of Patients, NHIRD: National Health Insurance Research Database, GPMD: General Practice Morbidity Database.
