# Supplementary material for: A systematic review of the incidence and prevalence of cardiac, cerebrovascular, and peripheral vascular disease in multiple sclerosis
Source: PubMed Central journal article supplement — Mult Scler. 2015 Mar;21(3):318–31. doi: 10.1177/1352458514564485 (PMC4404402; doi:10.1177/1352458514564485), 2015-03
Supplement: Supplemental_Table_21.pdf [file Supplemental_Table_21.pdf]

**Supplemental Table 21. Studies reporting the incidence of cerebrovascular disease in multiple sclerosis**

| Study (Year)                     | Region/ Sub-Region | Source/ Population               | Prevalence Day/Period | Diagnostic Criteria: MS/ Established By | Diagnostic Criteria: Cerebrovascular Disease/ Established By                                                    | Crude Overall Incidence (95%CI)                                      | Age-Standardized Overall Incidence (95%CI) | Crude Incidence (95%CI) |                  | Standardized Incidence (95%CI) |         | Quality Score |
|----------------------------------|--------------------|----------------------------------|-----------------------|-----------------------------------------|-----------------------------------------------------------------------------------------------------------------|----------------------------------------------------------------------|--------------------------------------------|-------------------------|------------------|--------------------------------|---------|---------------|
|                                  |                    |                                  |                       |                                         |                                                                                                                 |                                                                      |                                            | Males                   | Females          | Males                          | Females |               |
| Christiansen <sup>5</sup> (2010) | Denmark            | DNRP, incident (hospitalized) MS | 1977-2006             | ICD-10 G35.9, ICD-8 340 (prior to 1993) | Overall Stroke ICD-8 431-434 ICD-10 I61 I63 I64<br><br>Ischemic Stroke ICD-8 433-434 ICD-10 I63                 | Stroke 398/13,963 = 2.85%<br><br>Ischemic Stroke: 170/13,963 = 1.22% | NR                                         | NR                      | NR               | NR                             | NR      | 6/8           |
| Jadidi <sup>28</sup> (2013)      | Sweden             | M&H Co Database, incident MS     | 1987-2009             | ICD-8 340 ICD-9 340 ICD-10 G35          | Overall Stroke including ischemic, hemorrhagic and subarachnoid haemorrhage ICD-8 427.0, 427.1 ICD-9 428 ICD-10 | Stroke: 194/7,664 = 2.53%                                            | NR                                         | 71/2449 = 2.90%         | 123/5215 = 2.36% | NR                             | NR      | 5/8           |

|  |  |  |  |  |     |  |  |  |  |  |  |  |
|--|--|--|--|--|-----|--|--|--|--|--|--|--|
|  |  |  |  |  | 150 |  |  |  |  |  |  |  |
|--|--|--|--|--|-----|--|--|--|--|--|--|--|

NR: Not Reported, DNRP:Danish National Registry of Patients, M &H Co Database: Migration and Health Cohort Database (contains over 15 linkable Swedish national registers).
