# Supplementary material for: A systematic review of the incidence and prevalence of cardiac, cerebrovascular, and peripheral vascular disease in multiple sclerosis
Source: PubMed Central journal article supplement — Mult Scler. 2015 Mar;21(3):318–31. doi: 10.1177/1352458514564485 (PMC4404402; doi:10.1177/1352458514564485), 2015-03
Supplement: Supplemental_Table_22.pdf [file Supplemental_Table_22.pdf]

**Supplemental Table 22. Studies reporting the prevalence of cerebrovascular disease in multiple sclerosis**

| Study (Year)                   | Region/ Sub-Region      | Source/ Population                                        | Prevalence Day/Period | Diagnostic Criteria: MS/ Established By                         | Diagnostic Criteria: Cerebrovascular Disease / Established By                                            | Crude Overall Prevalence (95%CI)                                      | Age-Standardized Overall Prevalence (95%CI) | Crude Prevalence (95%CI) |         | Standardized Prevalence (95%CI) |         | Quality Score |
|--------------------------------|-------------------------|-----------------------------------------------------------|-----------------------|-----------------------------------------------------------------|----------------------------------------------------------------------------------------------------------|-----------------------------------------------------------------------|---------------------------------------------|--------------------------|---------|---------------------------------|---------|---------------|
|                                |                         |                                                           |                       |                                                                 |                                                                                                          |                                                                       |                                             | Males                    | Females | Males                           | Females |               |
| Allen <sup>7</sup> (2008)      | United States/ New York | SPARCS/ 95% of New York State acute care hospitalizations | 1988-2002             | ICD-9-CM 340.0 as secondary discharge diagnosis                 | Ischemic stroke ICD-9-CM 434 and 436 Hemorrhagic stroke ICD-9-CM 430-432/ as primary discharge diagnosis | Ischemic stroke 140/9,949 = 1.41% Hemorrhagic stroke 38/9,949 = 0.38% | NR                                          | NR                       | NR      | NR                              | NR      | 4/8           |
| Fleming <sup>11</sup> (1994)   | United States           | Hospitalized Medicare MS population, age ≥ 65 years       | 1989                  | ICD-9-CM code 340 as a primary or secondary discharge diagnosis | Administrative data code (code NR)                                                                       | Cerebrovascular disorders except TIA (DRG 14) 1.86%                   | NR                                          | NR                       | NR      | NR                              | NR      | 4/8           |
| Finlayson <sup>22</sup> (2013) | United States/ Illinois | Community-dwelling recruited                              | NR                    | Self-report                                                     | Self-report                                                                                              | Stroke 1/178 = 0.56%                                                  | NR                                          | NR                       | NR      | NR                              | NR      | 2/9           |

|                                |                                      |                                                                         |                      |                                                                                                                                      |                                                                                             |                        |    |                      |                 |    |    |     |
|--------------------------------|--------------------------------------|-------------------------------------------------------------------------|----------------------|--------------------------------------------------------------------------------------------------------------------------------------|---------------------------------------------------------------------------------------------|------------------------|----|----------------------|-----------------|----|----|-----|
|                                |                                      | from<br>advertisements                                                  |                      |                                                                                                                                      |                                                                                             |                        |    |                      |                 |    |    |     |
| Kang <sup>8</sup><br>(2010)    | Taiwan                               | NHIRD<br>population,<br>age ≥ 15<br>years                               | 2007                 | NHRID<br>ICD-9-CM code<br>340                                                                                                        | ICD-9-CM 430-<br>437<br>at least one<br>hospitalization or<br>two ambulatory<br>claims      | 56/898 = 6.2%          | NR | NR                   | NR              | NR | NR | 4/8 |
| Khan <sup>9</sup><br>(2007)    | Australia/<br>Melbourne              | MS database<br>Royal<br>Melbourne<br>Hospital                           | Jan 2005-Feb<br>2005 | Neurologist<br>diagnosed: Poser<br>and Paty                                                                                          | Self-report                                                                                 | Stroke<br>1/62 = 1.61% | NR | NR                   | NR              | NR | NR | 3/9 |
| Krokki <sup>58</sup><br>(2006) | Finland/<br>Northern<br>Ostrobothnia | Outpatient<br>Department<br>of<br>Neurology<br>at OUH, all<br>new cases | 1990-2010            | ICD-9 3400A<br>(1990-1995)<br>ICD-10 G35<br>(1996-2010)<br>Neurologist<br>established<br>(Poser,<br>McDonald 2001,<br>McDonald 2005) | Medical records<br>review: ischemic<br>stroke diagnosed<br>by brain imaging<br>in 2010-2012 | 6/401 = 1.2%           | NR | 0/151 =<br>0.0%      | 6/340 =<br>1.8% | NR | NR | 6/8 |
| LaVela <sup>10</sup><br>(2012) | United States                        | National<br>cohort of<br>Veterans<br>with MS,<br>members of             | 2003, 2004           | Veterans<br>Benefits<br>Department<br>confirmed                                                                                      | Telephone and<br>mailed survey<br>(Multiple<br>Sclerosis- Health<br>Care Questionnaire      | NR                     | NR | 80/1142<br>=<br>7.0% | NR              | NR | NR | 4/8 |

|                               |             |                                    |      |               |                                                                                             |                                                   |    |    |    |    |    |     |
|-------------------------------|-------------|------------------------------------|------|---------------|---------------------------------------------------------------------------------------------|---------------------------------------------------|----|----|----|----|----|-----|
|                               |             | veteran<br>service<br>organization |      |               | using questions<br>similar to BRFSS)                                                        |                                                   |    |    |    |    |    |     |
| Nuyen <sup>39</sup><br>(2006) | Netherlands | DNSGP                              | 2001 | ICPC code N86 | Consultation with<br>GP during (1-year<br>period).<br>Stroke<br>ICPC K90<br>TIA<br>ICPC K89 | Stroke<br>1/241 = 0.4%<br><br>TIA<br>0/241 = 0.0% | NR | NR | NR | NR | NR | 5/8 |

NR: Not Reported, SPARCS: New York Department of Health Statewide Planning and Research Cooperative System, NHIRD- National Health Insurance Research Database, OUH: Oulu University Hospital, BRFSS: Behavioral Risk Factor Surveillance System, DNSGP: Dutch National Survey of General Practice, GP: General Practitioner.
