# Supplementary material for: A systematic review of the incidence and prevalence of cardiac, cerebrovascular, and peripheral vascular disease in multiple sclerosis
Source: PubMed Central journal article supplement — Mult Scler. 2015 Mar;21(3):318–31. doi: 10.1177/1352458514564485 (PMC4404402; doi:10.1177/1352458514564485), 2015-03
Supplement: Supplemental_Table_23.pdf [file Supplemental_Table_23.pdf]

**Supplemental Table 23. The incidence and prevalence of cerebrovascular disease in the multiple sclerosis population as compared to controls**

| Study (year)                     | MS, n  | Controls, n (matched)                                    | Source of controls                                       | Cerebrovascular Disease in MS                                                                                                                                                         | Cerebrovascular Disease in controls                                                                                                                                                         | Comparison of MS: Controls                                                                                                                                      |
|----------------------------------|--------|----------------------------------------------------------|----------------------------------------------------------|---------------------------------------------------------------------------------------------------------------------------------------------------------------------------------------|---------------------------------------------------------------------------------------------------------------------------------------------------------------------------------------------|-----------------------------------------------------------------------------------------------------------------------------------------------------------------|
| <i>Incidence</i>                 |        |                                                          |                                                          |                                                                                                                                                                                       |                                                                                                                                                                                             |                                                                                                                                                                 |
| Christiansen <sup>5</sup> (2010) | 13,963 | 66,407 (yes: sex, age)                                   | DNRP general population                                  | At 1 year<br>Stroke<br>38/13,963 = 0.27%<br>Ischemic stroke<br>17/13,963 = 0.12%<br><br>At 2-30yrs follow-up<br>Stroke<br>360/13,963 = 2.58%<br>Ischemic stroke<br>153/13,963 = 1.09% | At 1 year<br>Stroke<br>49/66,407 = 0.074%<br>Ischemic stroke<br>17/66,407 = 0.026%<br><br>At 2-30yrs follow-up<br>Stroke<br>2,269/66,407 = 3.42%<br>Ischemic stroke<br>1,067/66,407 = 1.61% | Stroke:<br>1 year<br>1.96 (1.42–2.71)<br>2-30 years<br>1.23 (1.10–1.38)<br><br>Ischemic Stroke:<br>1 year<br>1.91 (1.18–3.10)<br>2-30 years<br>1.11 (0.94–1.32) |
| Jadidi <sup>28</sup> (2013)      | 7,664  | 66,215 (yes: sex, age)                                   | Total Population Register of Sweden                      | 194/7,664 = 2.53%                                                                                                                                                                     | 728/66,214 = 1.10%                                                                                                                                                                          | Adjusted IRR<br>1.72 (1.47–2.01)                                                                                                                                |
| <i>Prevalence</i>                |        |                                                          |                                                          |                                                                                                                                                                                       |                                                                                                                                                                                             |                                                                                                                                                                 |
| Allen <sup>7</sup> (2008)        | 9,949  | 19,898 (yes: age, gender, race/ethnicity, and insurance) | Hospitalizations from SPARCS database of non-MS patients | Ischemic stroke<br>140/9,949 = 1.41%<br>Hemorrhagic stroke<br>38/9,949 = 0.38%                                                                                                        | Ischemic stroke<br>199/18,898 = 1.00%<br>Hemorrhagic stroke<br>69/18,898 = 0.35%                                                                                                            | Ischemic stroke<br>OR<br>1.66 (1.33–2.09)<br>Hemorrhagic stroke<br>OR 1.14 (0.76–1.71)                                                                          |
| Fleming <sup>11</sup> (1994)     | 5384   | 5384 (yes: sex, age)                                     | Medicare Population without history of MS                | 1.86%                                                                                                                                                                                 | 2.58%                                                                                                                                                                                       | Statistically significant difference                                                                                                                            |

|                                |       |                                                                                   |                                                                                                          |               |                 |                           |
|--------------------------------|-------|-----------------------------------------------------------------------------------|----------------------------------------------------------------------------------------------------------|---------------|-----------------|---------------------------|
|                                |       |                                                                                   |                                                                                                          |               |                 | using $\chi^2$ (P < 0.05) |
| Kang <sup>8</sup><br>(2010)    | 898   | 4490 (yes: sex, age,<br>monthly income, level<br>of urbanization in<br>community) | Randomly selected patients from the NHIRD                                                                | 56/898 = 6.2% | 73/4,490 = 1.6% | OR<br>3.7 (2.9-4.1)       |
| Khan <sup>9</sup><br>(2007)    | 62    | 62 (no)                                                                           | Caregivers of MS participants                                                                            | 1/62 = 1.61%  | 0/62 = 0%       | NR                        |
| LaVela <sup>10</sup><br>(2012) | 1,142 | 31,500 (no)                                                                       | Historical data from respondents to 2003 BRFSS:<br>General Veteran U.S. Population with no history of MS | 7.0%          | 4.2%            | P<0.001                   |

OR: Odds Ratio, IRR: Incidence Rate Ratio, SPARCS: New York Department of Health Statewide Planning and Research Cooperative System, DNRP: Danish National Registry of Patients, NHIRD: National Health Insurance Research Database, BRFSS: Behavioral Risk Factor Surveillance System.
