# Supplementary material for: A systematic review of the incidence and prevalence of cardiac, cerebrovascular, and peripheral vascular disease in multiple sclerosis
Source: PubMed Central journal article supplement — Mult Scler. 2015 Mar;21(3):318–31. doi: 10.1177/1352458514564485 (PMC4404402; doi:10.1177/1352458514564485), 2015-03
Supplement: Supplemental_Table_24.pdf [file Supplemental_Table_24.pdf]

**Supplemental Table 33. Studies reporting the prevalence of peripheral vascular disease in multiple sclerosis**

| Study (Year)                                                   | Region/ Sub-Region | Source/ Population                       | Prevalence Day/Period | Diagnostic Criteria: MS/ Established By                                                 | Diagnostic Criteria: Peripheral Vascular Disease/ Established By                                                                             | Crude Overall Prevalence (95%CI)                     | Age-Standardized Overall Prevalence /100,000 (95%CI) | Crude Prevalence /100,000 (95%CI) |         | Standardized Prevalence (95%CI)/100,000 |         | Quality Score |
|----------------------------------------------------------------|--------------------|------------------------------------------|-----------------------|-----------------------------------------------------------------------------------------|----------------------------------------------------------------------------------------------------------------------------------------------|------------------------------------------------------|------------------------------------------------------|-----------------------------------|---------|-----------------------------------------|---------|---------------|
|                                                                |                    |                                          |                       |                                                                                         |                                                                                                                                              |                                                      |                                                      | Males                             | Females | Males                                   | Females |               |
| Kang <sup>8</sup> (2010)                                       | Taiwan             | NHIRD population, age >15 years          | 2007                  | At least two claims with ICD-9-CM code 340 in 2007, under care of certified neurologist | ICD-9-CM 440.0-440.9, 441.2, 441.4, 441.7, 441.9, 443.0, 443.1-443.9, 444, 444.0-444.9, 447.1 at least one hospital or two ambulatory claims | 34/898 = 3.8%                                        | NR                                                   | NR                                | NR      | NR                                      | NR      | 4/8           |
| Marrie <sup>35</sup> (2008)<br><br>Marrie <sup>51</sup> (2011) | United States      | NARCOMS Registry population (volunteers) | 2006                  | Self-report <sup>a</sup>                                                                | Online/Mailed Survey using validated questionnaire                                                                                           | 209/8,797 = 2.4%<br><br>At MS onset: 22/8,774 = 0.3% | 2.0% (1.7-2.3) <sup>b</sup>                          | NR                                | NR      | NR                                      | NR      | 5/9           |

|                                       |                             |                                                                 |      |       |                         |                                            |    |    |    |    |    |     |
|---------------------------------------|-----------------------------|-----------------------------------------------------------------|------|-------|-------------------------|--------------------------------------------|----|----|----|----|----|-----|
|                                       |                             |                                                                 |      |       |                         | At MS<br>diagnosis:<br>41/8,774 =<br>0.41% |    |    |    |    |    |     |
| Paz<br>Soldan <sup>40</sup><br>(2012) | United States/<br>Minnesota | All MS<br>patients<br>living in<br>Olmsted<br>County in<br>2000 | 2000 | Poser | Medical Chart<br>Review | 2/201 = 1.0%                               | NR | NR | NR | NR | NR | 6/8 |

NR: Not Reported, NHIRD: National Health Insurance Research Database, NARCOMS: North American Research Committee in Multiple Sclerosis.

a- Self-reported diagnoses of MS previously validated in random sample of study population against medical records and physician report; b – reported in another manuscript using the same study population
