# Supplementary material for: A systematic review of the incidence and prevalence of cardiac, cerebrovascular, and peripheral vascular disease in multiple sclerosis
Source: PubMed Central journal article supplement — Mult Scler. 2015 Mar;21(3):318–31. doi: 10.1177/1352458514564485 (PMC4404402; doi:10.1177/1352458514564485), 2015-03
Supplement: Supplemental_Table_25.pdf [file Supplemental_Table_25.pdf]

**Supplemental Table 25. The prevalence of peripheral vascular disease in the multiple sclerosis population as compared to controls**

| Study (year)               | MS, n | Controls, n (matched)                                                   | Source of controls                        | Peripheral vascular disease in MS | Peripheral vascular disease in controls                 | Statistical Comparison |
|----------------------------|-------|-------------------------------------------------------------------------|-------------------------------------------|-----------------------------------|---------------------------------------------------------|------------------------|
| Kang <sup>1</sup> (2010)   | 898   | 4490 (yes: sex, age, monthly income level of urbanization in community) | Randomly selected patients from the NHIRD | 34/989 = 3.8%                     | 27/4,490 = 0.6%                                         | OR<br>6.6(4.0-11.0)    |
| Marrie <sup>2</sup> (2011) | 8,983 | 5,083 (data from NHANES 1999-2002) (no)                                 | NHANES 1999-2002                          | 2.0% (1.7-2.3)                    | 2.1% (1.8-2.4) <60 years<br>12.0% (11.2-12.8) >60 years | NR                     |

NR: Not Reported, OR: Odds Ratio, NHIRD: National Health Insurance Research Database, NHANES: National Health and Nutritional Survey.
